# Supplementary material for: Assessment of facility-based tuberculosis data quality in an integrated HIV/TB database in three South African districts
Source: PubMed Central journal article supplement (PMC10021242; doi:10.1371/journal.pgph.0000312), 2022-09-28
Supplement: pgph.0000312.s001.pdf [file pgph.0000312.s001.pdf]

# National Tuberculosis Control Programme

# TB IDENTIFICATION REGISTER

2020 Version  
GW20/13

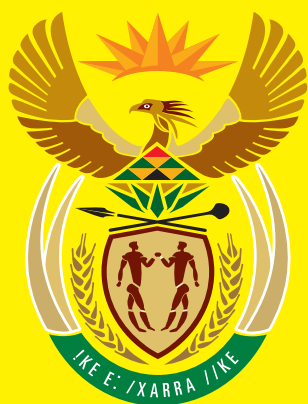

health

Department:  
Health  
**REPUBLIC OF SOUTH AFRICA**

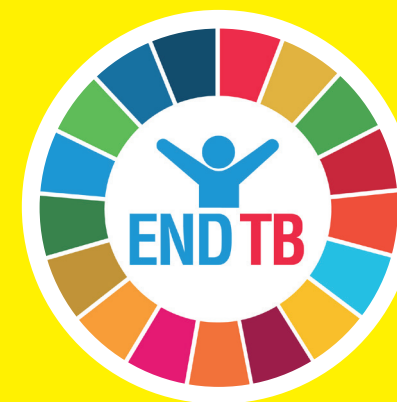

START DATE: ..... END DATE: .....

DISTRICT: ..... FACILITY: ..... YEAR: .....



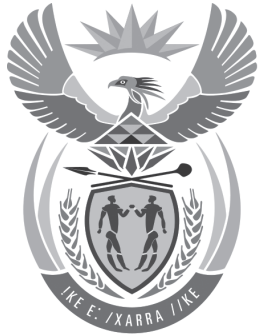

# health

Department:  
Health  
**REPUBLIC OF SOUTH AFRICA**

## AIM:

The main aim of this Register is to collect all the necessary information on people with TB symptoms, to assist with the following:

1. Follow-up of patients with positive results who do not come back for their results.
2. Monitoring whether all the results of specimens sent to the laboratory are returned to the facility.
3. Monitoring of the Turn-Around-Time (TAT) for results.
4. Estimating the laboratory supplies needed by the facility.
5. Follow-up of symptomatic patients referred to hospital for further investigations and final diagnosis.

## COMPLETION OF THE TUBERCULOSIS IDENTIFICATION REGISTER:

1. All patients a who have one or more of the TB symptoms indicated in the TB screening tool must be recorded in this register.
2. ALL Household Contacts MUST be recorded in this register, irrespective of TB symptoms.
3. ALL HIV Positive pregnant woman enrolled in ANC for the first time MUST be recorded in this register irrespective of the TB screening outcome.
4. The 'Specimen Barcode number' is on the small barcode label on the laboratory request form. The label can be peeled off the form and affixed in the appropriate row in the register.
3. If the person is a household contact of a DS-TB or DR-TB patient, write "Y" in the upper row under the "Contact" column. In the bottom row of the same column indicate whether the index patient had drug susceptible TB (DS-TB) or drug resistant TB.
4. If not a household contact, write "No".
5. Write "Yes" at the top if the client was identified with TB symptom. Use the following codes for TB symptom to record at the bottom row. (1 = Cough for more than 2 weeks or any duration if HIV positive; 2 = Fever of more than 2 weeks; 3 = Unexplained loss of Weight/ Failure to thrive for children; 4 = Drenching night sweats; 5 = Fatigues or less playful for children.) If a client present with more than one symptom use comma (,) to separate. Write No if no TB symptom was identified but client meet criteria to be investigated.
6. Write "Yes" If patient is a known diabetic on treatment, "No" if a patient has tested before and told they are not diabetic, "unknown" if patient does not know or never tested before for diabetes.
7. Write "Pos" if patient is a known HIV positive person, "Neg" if patient tested negative in the past year, "Unk" if HIV status is unknown or patient has never tested before.
8. Write "Yes" if patient has been confirmed as pregnant, "No" if patient says she is not pregnant.
9. Write "Pos" if a patient has had a positive COVID -19 test in the past 2 weeks , "No" if the patient has tested negative for COVID-19 in the past 2 weeks or "unk" if the patient has not tested in the past 2 weeks.
10. Use the Column "Xpert" to record the results of the Xpert test. Use the top row to record the First test taken. Where a second Xpert specimen is collected following an unsuccessful first Xpert test ( leaked, indeterminate, contaminated specimen) this must be recorded in the second row in the Xpert test.
11. Where a pretreatment sputum specimen for baseline smear microscopy is collected following an Xpert positive result, this must be

entered in the column marked as "Smear Microscopy". Record the results of the test in top row (Pos, Neg, Scanty, not done/ no result), and record grading of smear positive results in the bottom row (i.e. +/+/+/+).

**Note:** All positive results must be recorded with a RED pen, and all other results recorded with a black pen in the register.

12. The date the specimen was collected must be entered in the "Date specimen collected" column and the date the results were received at the facility entered in the "Date Results received" column.
 

**Note:** The TAT is calculated from the time the sputum was collected to the time the results were received in the facility NOT the date on the laboratory result report.
13. Indicate Rifampicin sensitivity based on the Xpert lab results. Record "R" if Rifampicin resistance and "S" if Rifampicin Sensitive.
14. For non Bacteriological Investigations, record the date in which investigation was conducted at the top and results at the bottom. If "Other tests" write the test used to make a diagnosis under "Remarks" column.
15. The treatment start date must be entered in the column "TB confirmed clients" in the correct format. The TB Registration number must be recorded in the "Remarks Column".
16. If the patient died before treatment was started, tick in the column "Died before treatment start" and if the date of death is known it must be entered.
17. If the patient is lost to follow-up, tick in the column "Lost to follow up" and explain under "Remarks" column the outcomes of the tracing. The definition of loss to follow up in this case is a patient who missed an appointment for the results, traced but not found in two weeks.
18. When other tests such as Culture, LPA and DST are conducted, the specimen collection date should be recorded under column "Date specimen collected". The results should be entered under the column "Results" and "Resistance" columns. If tests other than bacteriological tests are conducted, these must be recorded under the column "Non-Bacteriological Test". The Date of the test should be recorded in the bottom row, the test result should be recorded in the top row.
19. If patient is diagnosed with DR-TB, the treatment start date must be entered in the "Patient diagnosed with TB/ DR-TB" column. The MDR-TB treatment site where the patient was referred must be documented under the "Remarks" column.
20. If patient with DR-TB "died" or "lost to follow up" before treatment is started capture in the register as outlined in 16 and 17 above.
21. For all contacts (irrespective of HIV status) and PLHIV found not to have TB (negative test results) and started on TPT, the TPT start date must be entered in the column "TPT start date".
22. At the end of each page the totals must calculated and entered in the last row labelled "totals".
23. The person completing the register must write his/her name and sign at the bottom of each page.
26. The person who checks the data for correctness and completeness must write his/her name and sign at the bottom of each page.

## COMPLETION OF THE DATA SUMMARY SHEET:

1. At the end of each register is a copy of the data summary sheet that needs to be completed at the end of each month.
2. The data elements from the summary sheet must be entered in the Monthly Data Input Form.
3. At the end of each quarter the data must be collated and submitted to the District as part of the quarterly reports.
4. The data summary sheets remain in the facility for audit/ data verification purposes.

## TUBERCULOSIS IDENTIFICATION REGISTER

District: .....

| Specimen Barcode Number <sup>1</sup> | Patient Folder Number | Surname<br>(Top row)<br><br>First name(s)<br>(Bottom row) | Date of birth<br>(Top row)<br>DD / MM / YYYY | Gender<br>M / F | Physical Home Address <sup>2</sup> /<br>Land Mark | Telephone /<br>Cellphone | TB symptoms<br>Identified | Risk Groups                |                                  |                                 |                        |                                    | TB Investigations             |                               |   |
|--------------------------------------|-----------------------|-----------------------------------------------------------|----------------------------------------------|-----------------|---------------------------------------------------|--------------------------|---------------------------|----------------------------|----------------------------------|---------------------------------|------------------------|------------------------------------|-------------------------------|-------------------------------|---|
|                                      |                       |                                                           | Age<br>(Bottom row)                          |                 |                                                   |                          |                           | Yes / No                   | Contact (Y / N)<br>(Top row)     | HIV Status<br>(Pos / Neg / Unk) | Pregnant<br>(Y / N)    | Diabetes Mellitus<br>(Y / N / Unk) | COVID-19<br>(Pos / Neg / Unk) | Bacteriological investigation |   |
|                                      |                       |                                                           |                                              |                 |                                                   |                          |                           | If Yes (Code) <sup>3</sup> | DS/ DR- TB / unk<br>(Bottom row) |                                 |                        |                                    |                               | BASELINE TESTS                |   |
|                                      |                       |                                                           |                                              |                 |                                                   |                          |                           |                            |                                  |                                 |                        |                                    |                               | 1                             | 1 |
|                                      |                       |                                                           |                                              |                 |                                                   |                          |                           |                            |                                  |                                 |                        |                                    |                               | 2                             | 2 |
|                                      |                       |                                                           |                                              |                 |                                                   |                          |                           |                            |                                  |                                 |                        |                                    |                               | 1                             | 1 |
|                                      |                       |                                                           |                                              |                 |                                                   |                          |                           |                            |                                  |                                 |                        |                                    |                               | 2                             | 2 |
|                                      |                       |                                                           |                                              |                 |                                                   |                          |                           |                            |                                  |                                 |                        |                                    |                               | 1                             | 1 |
|                                      |                       |                                                           |                                              |                 |                                                   |                          |                           |                            |                                  |                                 |                        |                                    |                               | 2                             | 2 |
|                                      |                       |                                                           |                                              |                 |                                                   |                          |                           |                            |                                  |                                 |                        |                                    |                               | 1                             | 1 |
|                                      |                       |                                                           |                                              |                 |                                                   |                          |                           |                            |                                  |                                 |                        |                                    |                               | 2                             | 2 |
|                                      |                       |                                                           |                                              |                 |                                                   |                          |                           |                            |                                  |                                 |                        |                                    |                               | 1                             | 1 |
|                                      |                       |                                                           |                                              |                 |                                                   |                          |                           |                            |                                  |                                 |                        |                                    |                               | 2                             | 2 |
|                                      |                       |                                                           |                                              |                 |                                                   |                          |                           |                            |                                  |                                 |                        |                                    |                               | 1                             | 1 |
|                                      |                       |                                                           |                                              |                 |                                                   |                          |                           |                            |                                  |                                 |                        |                                    |                               | 2                             | 2 |
|                                      |                       |                                                           |                                              |                 |                                                   |                          |                           |                            |                                  |                                 |                        |                                    |                               | 1                             | 1 |
|                                      |                       |                                                           |                                              |                 |                                                   |                          |                           |                            |                                  |                                 |                        |                                    |                               | 2                             | 2 |
| TOTALS:                              |                       |                                                           |                                              |                 |                                                   |                          |                           |                            | Total number positive:           | Total number pregnant:          | Total number Diabetic: | Total number positive:             |                               |                               |   |

1. Place Barcode sticker from the laboratory form / write Barcode number eg. AAGX8459

2. Full detailed address of where the patient lives or can be reached during the day.

3. Use the coding on the instruction cover for TB symptoms (i.e. 1= Cough)

4. Write down a date the patient produced specimen

5. Write date when the test results were received by facility

Sub District: ..... Facility Name: .....

| TB Investigations                      |                                                              |                                                     |         |                      |                                           |                                     |                         |                          |                               |                           |                               | TB Confirmed Clients (DS-TB and DR-TB)                |                                       |                             | REMARKS            |                                                                     |
|----------------------------------------|--------------------------------------------------------------|-----------------------------------------------------|---------|----------------------|-------------------------------------------|-------------------------------------|-------------------------|--------------------------|-------------------------------|---------------------------|-------------------------------|-------------------------------------------------------|---------------------------------------|-----------------------------|--------------------|---------------------------------------------------------------------|
| Bacteriological investigation          |                                                              |                                                     |         |                      |                                           | Non- Bacteriological Investigations |                         |                          |                               |                           |                               | Date Treatment Started <sup>7</sup><br>DD / MM / YYYY | Died before Treatment Start<br>(Tick) | Loss to follow up<br>(Tick) |                    | TPT Start Date <sup>8</sup><br>(for contacts, PLHIV) DD / MM / YYYY |
| Xpert<br>(1 <sup>st</sup> Test)        | Smear Microscopy<br>(Pos, Neg, Scanty, not done / no result) | TEST RESULT TURN AROUND TIME <sup>6</sup><br>(Tick) |         | Rif Susceptibility   | TB CULTURE / LPA / DST                    |                                     |                         | X-Ray<br>DD / MM / YYYY  | U-LAM<br>DD / MM / YYYY       | Mantoux<br>DD / MM / YYYY | Other Tests<br>DD / MM / YYYY |                                                       |                                       |                             |                    |                                                                     |
| Xpert<br>(2 <sup>nd</sup> test if any) | Grading<br>(bottom row)                                      | < 48hrs                                             | > 48hrs | R / S                | Date specimen collected<br>DD / MM / YYYY | Result<br>(Pos / Neg)               | Resistance<br>( R / H ) | Result                   | Result                        | Result                    | Result                        |                                                       |                                       |                             |                    |                                                                     |
| 1                                      |                                                              | 1                                                   | 1       |                      |                                           |                                     |                         |                          |                               |                           |                               |                                                       |                                       |                             |                    |                                                                     |
| 2                                      |                                                              | 2                                                   | 2       |                      |                                           |                                     |                         |                          |                               |                           |                               |                                                       |                                       |                             |                    |                                                                     |
| 1                                      |                                                              | 1                                                   | 1       |                      |                                           |                                     |                         |                          |                               |                           |                               |                                                       |                                       |                             |                    |                                                                     |
| 2                                      |                                                              | 2                                                   | 2       |                      |                                           |                                     |                         |                          |                               |                           |                               |                                                       |                                       |                             |                    |                                                                     |
| 1                                      |                                                              | 1                                                   | 1       |                      |                                           |                                     |                         |                          |                               |                           |                               |                                                       |                                       |                             |                    |                                                                     |
| 2                                      |                                                              | 2                                                   | 2       |                      |                                           |                                     |                         |                          |                               |                           |                               |                                                       |                                       |                             |                    |                                                                     |
| 1                                      |                                                              | 1                                                   | 1       |                      |                                           |                                     |                         |                          |                               |                           |                               |                                                       |                                       |                             |                    |                                                                     |
| 2                                      |                                                              | 2                                                   | 2       |                      |                                           |                                     |                         |                          |                               |                           |                               |                                                       |                                       |                             |                    |                                                                     |
| 1                                      |                                                              | 1                                                   | 1       |                      |                                           |                                     |                         |                          |                               |                           |                               |                                                       |                                       |                             |                    |                                                                     |
| 2                                      |                                                              | 2                                                   | 2       |                      |                                           |                                     |                         |                          |                               |                           |                               |                                                       |                                       |                             |                    |                                                                     |
| 1                                      |                                                              | 1                                                   | 1       |                      |                                           |                                     |                         |                          |                               |                           |                               |                                                       |                                       |                             |                    |                                                                     |
| 2                                      |                                                              | 2                                                   | 2       |                      |                                           |                                     |                         |                          |                               |                           |                               |                                                       |                                       |                             |                    |                                                                     |
| 1                                      |                                                              | 1                                                   | 1       |                      |                                           |                                     |                         |                          |                               |                           |                               |                                                       |                                       |                             |                    |                                                                     |
| 2                                      |                                                              | 2                                                   | 2       |                      |                                           |                                     |                         |                          |                               |                           |                               |                                                       |                                       |                             |                    |                                                                     |
| 1                                      |                                                              | 1                                                   | 1       |                      |                                           |                                     |                         |                          |                               |                           |                               |                                                       |                                       |                             |                    |                                                                     |
| 2                                      |                                                              | 2                                                   | 2       |                      |                                           |                                     |                         |                          |                               |                           |                               |                                                       |                                       |                             |                    |                                                                     |
| 1                                      |                                                              | 1                                                   | 1       |                      |                                           |                                     |                         |                          |                               |                           |                               |                                                       |                                       |                             |                    |                                                                     |
| 2                                      |                                                              | 2                                                   | 2       |                      |                                           |                                     |                         |                          |                               |                           |                               |                                                       |                                       |                             |                    |                                                                     |
| Total Xpert Positive:                  |                                                              |                                                     |         | Total Rif Resistance |                                           | Total tested Positive:              | Total MDR-TB:           | Total number suggestive: | Total number tested positive: | Total number reactive:    | Total:                        | Total started Rx:                                     | Total died:                           | Total not on Rx:            | Total started TPT: |                                                                     |

6. Tick whether sputum results were back within 48hrs.

7. Write date on which the patient was initiated on Treatment.

8. Write a date for TPT start.

Compiled by: ..... Signature: ..... Date: ..... Verified by: ..... Signature: ..... Date: .....

## TUBERCULOSIS IDENTIFICATION REGISTER

District: .....

| Specimen Barcode Number <sup>1</sup> | Patient Folder Number | Surname<br>(Top row)<br><br>First name(s)<br>(Bottom row) | Date of birth<br>(Top row)<br>DD / MM / YYYY | Gender<br>M / F | Physical Home Address <sup>2</sup> /<br>Land Mark | Telephone /<br>Cellphone | TB symptoms<br>Identified | Risk Groups                |                                  |                                 |                              |                                    | TB Investigations             |                               |   |
|--------------------------------------|-----------------------|-----------------------------------------------------------|----------------------------------------------|-----------------|---------------------------------------------------|--------------------------|---------------------------|----------------------------|----------------------------------|---------------------------------|------------------------------|------------------------------------|-------------------------------|-------------------------------|---|
|                                      |                       |                                                           | Age<br>(Bottom row)                          |                 |                                                   |                          |                           | Yes / No                   | Contact (Y / N)<br>(Top row)     | HIV Status<br>(Pos / Neg / Unk) | Pregnant<br>(Y / N)          | Diabetes Mellitus<br>(Y / N / Unk) | COVID-19<br>(Pos / Neg / Unk) | Bacteriological investigation |   |
|                                      |                       |                                                           |                                              |                 |                                                   |                          |                           | If Yes (Code) <sup>3</sup> | DS/ DR- TB / unk<br>(Bottom row) |                                 |                              |                                    |                               | BASELINE TESTS                |   |
|                                      |                       |                                                           |                                              |                 |                                                   |                          |                           |                            |                                  |                                 |                              |                                    |                               | 1                             | 1 |
|                                      |                       |                                                           |                                              |                 |                                                   |                          |                           |                            |                                  |                                 |                              |                                    |                               | 2                             | 2 |
|                                      |                       |                                                           |                                              |                 |                                                   |                          |                           |                            |                                  |                                 |                              |                                    |                               | 1                             | 1 |
|                                      |                       |                                                           |                                              |                 |                                                   |                          |                           |                            |                                  |                                 |                              |                                    |                               | 2                             | 2 |
|                                      |                       |                                                           |                                              |                 |                                                   |                          |                           |                            |                                  |                                 |                              |                                    |                               | 1                             | 1 |
|                                      |                       |                                                           |                                              |                 |                                                   |                          |                           |                            |                                  |                                 |                              |                                    |                               | 2                             | 2 |
|                                      |                       |                                                           |                                              |                 |                                                   |                          |                           |                            |                                  |                                 |                              |                                    |                               | 1                             | 1 |
|                                      |                       |                                                           |                                              |                 |                                                   |                          |                           |                            |                                  |                                 |                              |                                    |                               | 2                             | 2 |
|                                      |                       |                                                           |                                              |                 |                                                   |                          |                           |                            |                                  |                                 |                              |                                    |                               | 1                             | 1 |
|                                      |                       |                                                           |                                              |                 |                                                   |                          |                           |                            |                                  |                                 |                              |                                    |                               | 2                             | 2 |
|                                      |                       |                                                           |                                              |                 |                                                   |                          |                           |                            |                                  |                                 |                              |                                    |                               | 1                             | 1 |
|                                      |                       |                                                           |                                              |                 |                                                   |                          |                           |                            |                                  |                                 |                              |                                    |                               | 2                             | 2 |
|                                      |                       |                                                           |                                              |                 |                                                   |                          |                           |                            |                                  |                                 |                              |                                    |                               | 1                             | 1 |
|                                      |                       |                                                           |                                              |                 |                                                   |                          |                           |                            |                                  |                                 |                              |                                    |                               | 2                             | 2 |
| TOTALS:                              |                       |                                                           |                                              |                 |                                                   |                          |                           |                            | Total<br>number<br>positive:     | Total<br>number<br>pregnant:    | Total<br>number<br>Diabetic: | Total<br>number<br>positive:       |                               |                               |   |

1. Place Barcode sticker from the laboratory form / write Barcode number eg. AAGX8459

2. Full detailed address of where the patient lives or can be reached during the day.

3. Use the coding on the instruction cover for TB symptoms (i.e. 1= Cough)

4. Write down a date the patient produced specimen

5. Write date when the test results were received by facility

Sub District: ..... Facility Name: .....

| TB Investigations                      |                                                              |                                                     |         |                      |                                           |                                     |                         |                          |                              |                           |                               | TB Confirmed Clients (DS-TB and DR-TB)                |                                       |                             | REMARKS            |                                                                     |
|----------------------------------------|--------------------------------------------------------------|-----------------------------------------------------|---------|----------------------|-------------------------------------------|-------------------------------------|-------------------------|--------------------------|------------------------------|---------------------------|-------------------------------|-------------------------------------------------------|---------------------------------------|-----------------------------|--------------------|---------------------------------------------------------------------|
| Bacteriological investigation          |                                                              |                                                     |         |                      |                                           | Non- Bacteriological Investigations |                         |                          |                              |                           |                               | Date Treatment Started <sup>7</sup><br>DD / MM / YYYY | Died before Treatment Start<br>(Tick) | Loss to follow up<br>(Tick) |                    | TPT Start Date <sup>8</sup><br>(for contacts, PLHIV) DD / MM / YYYY |
| Xpert<br>(1 <sup>st</sup> Test)        | Smear Microscopy<br>(Pos, Neg, Scanty, not done / no result) | TEST RESULT TURN AROUND TIME <sup>6</sup><br>(Tick) |         | Rif Susceptibility   | TB CULTURE / LPA / DST                    |                                     |                         | X-Ray<br>DD / MM / YYYY  | U-LAM<br>DD / MM / YYYY      | Mantoux<br>DD / MM / YYYY | Other Tests<br>DD / MM / YYYY |                                                       |                                       |                             |                    |                                                                     |
| Xpert<br>(2 <sup>nd</sup> test if any) | Grading<br>(bottom row)                                      | < 48hrs                                             | > 48hrs | R / S                | Date specimen collected<br>DD / MM / YYYY | Result<br>(Pos / Neg)               | Resistance<br>( R / H ) | Result                   | Result                       | Result                    | Result                        |                                                       |                                       |                             |                    |                                                                     |
| 1                                      |                                                              | 1                                                   | 1       |                      |                                           |                                     |                         |                          |                              |                           |                               |                                                       |                                       |                             |                    |                                                                     |
| 2                                      |                                                              | 2                                                   | 2       |                      |                                           |                                     |                         |                          |                              |                           |                               |                                                       |                                       |                             |                    |                                                                     |
| 1                                      |                                                              | 1                                                   | 1       |                      |                                           |                                     |                         |                          |                              |                           |                               |                                                       |                                       |                             |                    |                                                                     |
| 2                                      |                                                              | 2                                                   | 2       |                      |                                           |                                     |                         |                          |                              |                           |                               |                                                       |                                       |                             |                    |                                                                     |
| 1                                      |                                                              | 1                                                   | 1       |                      |                                           |                                     |                         |                          |                              |                           |                               |                                                       |                                       |                             |                    |                                                                     |
| 2                                      |                                                              | 2                                                   | 2       |                      |                                           |                                     |                         |                          |                              |                           |                               |                                                       |                                       |                             |                    |                                                                     |
| 1                                      |                                                              | 1                                                   | 1       |                      |                                           |                                     |                         |                          |                              |                           |                               |                                                       |                                       |                             |                    |                                                                     |
| 2                                      |                                                              | 2                                                   | 2       |                      |                                           |                                     |                         |                          |                              |                           |                               |                                                       |                                       |                             |                    |                                                                     |
| 1                                      |                                                              | 1                                                   | 1       |                      |                                           |                                     |                         |                          |                              |                           |                               |                                                       |                                       |                             |                    |                                                                     |
| 2                                      |                                                              | 2                                                   | 2       |                      |                                           |                                     |                         |                          |                              |                           |                               |                                                       |                                       |                             |                    |                                                                     |
| 1                                      |                                                              | 1                                                   | 1       |                      |                                           |                                     |                         |                          |                              |                           |                               |                                                       |                                       |                             |                    |                                                                     |
| 2                                      |                                                              | 2                                                   | 2       |                      |                                           |                                     |                         |                          |                              |                           |                               |                                                       |                                       |                             |                    |                                                                     |
| 1                                      |                                                              | 1                                                   | 1       |                      |                                           |                                     |                         |                          |                              |                           |                               |                                                       |                                       |                             |                    |                                                                     |
| 2                                      |                                                              | 2                                                   | 2       |                      |                                           |                                     |                         |                          |                              |                           |                               |                                                       |                                       |                             |                    |                                                                     |
| 1                                      |                                                              | 1                                                   | 1       |                      |                                           |                                     |                         |                          |                              |                           |                               |                                                       |                                       |                             |                    |                                                                     |
| 2                                      |                                                              | 2                                                   | 2       |                      |                                           |                                     |                         |                          |                              |                           |                               |                                                       |                                       |                             |                    |                                                                     |
| 1                                      |                                                              | 1                                                   | 1       |                      |                                           |                                     |                         |                          |                              |                           |                               |                                                       |                                       |                             |                    |                                                                     |
| 2                                      |                                                              | 2                                                   | 2       |                      |                                           |                                     |                         |                          |                              |                           |                               |                                                       |                                       |                             |                    |                                                                     |
| Total Xpert Positive:                  |                                                              |                                                     |         | Total Rif Resistance |                                           | Total tested Positive:              | Total MDR-TB:           | Total number suggestive: | Total number testedpositive: | Total number reactive:    | Total:                        | Total started Rx:                                     | Total died:                           | Total not on Rx:            | Total started TPT: |                                                                     |

6. Tick whether sputum results were back within 48hrs.

7. Write date on which the patient was initiated on Treatment.

8. Write a date for TPT start.

Compiled by: ..... Signature: ..... Date: ..... Verified by: ..... Signature: ..... Date: .....

## TUBERCULOSIS IDENTIFICATION REGISTER

District: .....

| Specimen Barcode Number <sup>1</sup> | Patient Folder Number | Surname<br>(Top row)<br><br>First name(s)<br>(Bottom row) | Date of birth<br>(Top row)<br>DD / MM / YYYY | Gender<br>M / F | Physical Home Address <sup>2</sup> /<br>Land Mark | Telephone /<br>Cellphone | TB symptoms<br>Identified | Risk Groups                |                                  |                                 |                        |                                                        | TB Investigations                                        |                               |   |
|--------------------------------------|-----------------------|-----------------------------------------------------------|----------------------------------------------|-----------------|---------------------------------------------------|--------------------------|---------------------------|----------------------------|----------------------------------|---------------------------------|------------------------|--------------------------------------------------------|----------------------------------------------------------|-------------------------------|---|
|                                      |                       |                                                           | Age<br>(Bottom row)                          |                 |                                                   |                          |                           | Yes / No                   | Contact (Y / N)<br>(Top row)     | HIV Status<br>(Pos / Neg / Unk) | Pregnant<br>(Y / N)    | Diabetes Mellitus<br>(Y / N / Unk)                     | COVID-19<br>(Pos / Neg / Unk)                            | Bacteriological investigation |   |
|                                      |                       |                                                           |                                              |                 |                                                   |                          |                           | If Yes (Code) <sup>3</sup> | DS/ DR- TB / unk<br>(Bottom row) |                                 |                        |                                                        |                                                          | BASELINE TESTS                |   |
|                                      |                       |                                                           |                                              |                 |                                                   |                          |                           |                            |                                  |                                 |                        | Date Specimen collected <sup>4</sup><br>DD / MM / YYYY | Date test Result received <sup>5</sup><br>DD / MM / YYYY |                               |   |
|                                      |                       |                                                           |                                              |                 |                                                   |                          |                           |                            |                                  |                                 |                        |                                                        |                                                          | 1                             | 1 |
|                                      |                       |                                                           |                                              |                 |                                                   |                          |                           |                            |                                  |                                 |                        |                                                        |                                                          | 2                             | 2 |
|                                      |                       |                                                           |                                              |                 |                                                   |                          |                           |                            |                                  |                                 |                        |                                                        |                                                          | 1                             | 1 |
|                                      |                       |                                                           |                                              |                 |                                                   |                          |                           |                            |                                  |                                 |                        |                                                        |                                                          | 2                             | 2 |
|                                      |                       |                                                           |                                              |                 |                                                   |                          |                           |                            |                                  |                                 |                        |                                                        |                                                          | 1                             | 1 |
|                                      |                       |                                                           |                                              |                 |                                                   |                          |                           |                            |                                  |                                 |                        |                                                        |                                                          | 2                             | 2 |
|                                      |                       |                                                           |                                              |                 |                                                   |                          |                           |                            |                                  |                                 |                        |                                                        |                                                          | 1                             | 1 |
|                                      |                       |                                                           |                                              |                 |                                                   |                          |                           |                            |                                  |                                 |                        |                                                        |                                                          | 2                             | 2 |
|                                      |                       |                                                           |                                              |                 |                                                   |                          |                           |                            |                                  |                                 |                        |                                                        |                                                          | 1                             | 1 |
|                                      |                       |                                                           |                                              |                 |                                                   |                          |                           |                            |                                  |                                 |                        |                                                        |                                                          | 2                             | 2 |
|                                      |                       |                                                           |                                              |                 |                                                   |                          |                           |                            |                                  |                                 |                        |                                                        |                                                          | 1                             | 1 |
|                                      |                       |                                                           |                                              |                 |                                                   |                          |                           |                            |                                  |                                 |                        |                                                        |                                                          | 2                             | 2 |
|                                      |                       |                                                           |                                              |                 |                                                   |                          |                           |                            |                                  |                                 |                        |                                                        |                                                          | 1                             | 1 |
|                                      |                       |                                                           |                                              |                 |                                                   |                          |                           |                            |                                  |                                 |                        |                                                        |                                                          | 2                             | 2 |
| TOTALS:                              |                       |                                                           |                                              |                 |                                                   |                          |                           |                            |                                  | Total number positive:          | Total number pregnant: | Total number Diabetic:                                 | Total number positive:                                   |                               |   |

1. Place Barcode sticker from the laboratory form / write Barcode number eg. AAGX8459

2. Full detailed address of where the patient lives or can be reached during the day.

3. Use the coding on the instruction cover for TB symptoms (i.e. 1= Cough)

4. Write down a date the patient produced specimen

5. Write date when the test results were received by facility



Sub District: ..... Facility Name: .....

| TB Investigations                      |                                                              |                                                     |         |                      |                                           |                                     |                         |                          |                              |                           |                               | TB Confirmed Clients (DS-TB and DR-TB)                |                                       |                             | TPT Start Date <sup>8</sup><br>(for contacts, PLHIV) DD / MM / YYYY | REMARKS |
|----------------------------------------|--------------------------------------------------------------|-----------------------------------------------------|---------|----------------------|-------------------------------------------|-------------------------------------|-------------------------|--------------------------|------------------------------|---------------------------|-------------------------------|-------------------------------------------------------|---------------------------------------|-----------------------------|---------------------------------------------------------------------|---------|
| Bacteriological investigation          |                                                              |                                                     |         |                      |                                           | Non- Bacteriological Investigations |                         |                          |                              |                           |                               | Date Treatment Started <sup>7</sup><br>DD / MM / YYYY | Died before Treatment Start<br>(Tick) | Loss to follow up<br>(Tick) |                                                                     |         |
| Xpert<br>(1 <sup>st</sup> Test)        | Smear Microscopy<br>(Pos, Neg, Scanty, not done / no result) | TEST RESULT TURN AROUND TIME <sup>6</sup><br>(Tick) |         | Rif Susceptibility   | TB CULTURE / LPA / DST                    |                                     |                         | X-Ray<br>DD / MM / YYYY  | U-LAM<br>DD / MM / YYYY      | Mantoux<br>DD / MM / YYYY | Other Tests<br>DD / MM / YYYY |                                                       |                                       |                             |                                                                     |         |
| Xpert<br>(2 <sup>nd</sup> test if any) | Grading<br>(bottom row)                                      | < 48hrs                                             | > 48hrs | R / S                | Date specimen collected<br>DD / MM / YYYY | Result<br>(Pos / Neg)               | Resistance<br>( R / H ) | Result                   | Result                       | Result                    | Result                        |                                                       |                                       |                             |                                                                     |         |
| 1                                      |                                                              | 1                                                   | 1       |                      |                                           |                                     |                         |                          |                              |                           |                               |                                                       |                                       |                             |                                                                     |         |
| 2                                      |                                                              | 2                                                   | 2       |                      |                                           |                                     |                         |                          |                              |                           |                               |                                                       |                                       |                             |                                                                     |         |
| 1                                      |                                                              | 1                                                   | 1       |                      |                                           |                                     |                         |                          |                              |                           |                               |                                                       |                                       |                             |                                                                     |         |
| 2                                      |                                                              | 2                                                   | 2       |                      |                                           |                                     |                         |                          |                              |                           |                               |                                                       |                                       |                             |                                                                     |         |
| 1                                      |                                                              | 1                                                   | 1       |                      |                                           |                                     |                         |                          |                              |                           |                               |                                                       |                                       |                             |                                                                     |         |
| 2                                      |                                                              | 2                                                   | 2       |                      |                                           |                                     |                         |                          |                              |                           |                               |                                                       |                                       |                             |                                                                     |         |
| 1                                      |                                                              | 1                                                   | 1       |                      |                                           |                                     |                         |                          |                              |                           |                               |                                                       |                                       |                             |                                                                     |         |
| 2                                      |                                                              | 2                                                   | 2       |                      |                                           |                                     |                         |                          |                              |                           |                               |                                                       |                                       |                             |                                                                     |         |
| 1                                      |                                                              | 1                                                   | 1       |                      |                                           |                                     |                         |                          |                              |                           |                               |                                                       |                                       |                             |                                                                     |         |
| 2                                      |                                                              | 2                                                   | 2       |                      |                                           |                                     |                         |                          |                              |                           |                               |                                                       |                                       |                             |                                                                     |         |
| 1                                      |                                                              | 1                                                   | 1       |                      |                                           |                                     |                         |                          |                              |                           |                               |                                                       |                                       |                             |                                                                     |         |
| 2                                      |                                                              | 2                                                   | 2       |                      |                                           |                                     |                         |                          |                              |                           |                               |                                                       |                                       |                             |                                                                     |         |
| 1                                      |                                                              | 1                                                   | 1       |                      |                                           |                                     |                         |                          |                              |                           |                               |                                                       |                                       |                             |                                                                     |         |
| 2                                      |                                                              | 2                                                   | 2       |                      |                                           |                                     |                         |                          |                              |                           |                               |                                                       |                                       |                             |                                                                     |         |
| 1                                      |                                                              | 1                                                   | 1       |                      |                                           |                                     |                         |                          |                              |                           |                               |                                                       |                                       |                             |                                                                     |         |
| 2                                      |                                                              | 2                                                   | 2       |                      |                                           |                                     |                         |                          |                              |                           |                               |                                                       |                                       |                             |                                                                     |         |
| 1                                      |                                                              | 1                                                   | 1       |                      |                                           |                                     |                         |                          |                              |                           |                               |                                                       |                                       |                             |                                                                     |         |
| 2                                      |                                                              | 2                                                   | 2       |                      |                                           |                                     |                         |                          |                              |                           |                               |                                                       |                                       |                             |                                                                     |         |
| Total Xpert Positive:                  |                                                              |                                                     |         | Total Rif Resistance |                                           | Total tested Positive:              | Total MDR-TB:           | Total number suggestive: | Total number testedpositive: | Total number reactive:    | Total:                        | Total started Rx:                                     | Total died:                           | Total not on Rx:            | Total started TPT:                                                  |         |

6. Tick whether sputum results were back within 48hrs.

7. Write date on which the patient was initiated on Treatment.

8. Write a date for TPT start.

Compiled by: ..... Signature: ..... Date: ..... Verified by: ..... Signature: ..... Date: .....

## TUBERCULOSIS IDENTIFICATION REGISTER

District: .....

| Specimen Barcode Number <sup>1</sup> | Patient Folder Number | Surname<br>(Top row)<br><br>First name(s)<br>(Bottom row) | Date of birth<br>(Top row)<br>DD / MM / YYYY | Gender<br>M / F | Physical Home Address <sup>2</sup> /<br>Land Mark | Telephone /<br>Cellphone | TB symptoms Identified           | Risk Groups                                            |                                 |                        |                                    |                               | TB Investigations                                        |   |
|--------------------------------------|-----------------------|-----------------------------------------------------------|----------------------------------------------|-----------------|---------------------------------------------------|--------------------------|----------------------------------|--------------------------------------------------------|---------------------------------|------------------------|------------------------------------|-------------------------------|----------------------------------------------------------|---|
|                                      |                       |                                                           | Age<br>(Bottom row)                          |                 |                                                   |                          | Yes / No                         | Contact (Y / N)<br>(Top row)                           | HIV Status<br>(Pos / Neg / Unk) | Pregnant<br>(Y / N)    | Diabetes Mellitus<br>(Y / N / Unk) | COVID-19<br>(Pos / Neg / Unk) | Bacteriological investigation                            |   |
|                                      |                       |                                                           | If Yes (Code) <sup>3</sup>                   |                 |                                                   |                          | DS/ DR- TB / unk<br>(Bottom row) | Date Specimen collected <sup>4</sup><br>DD / MM / YYYY |                                 |                        |                                    |                               | Date test Result received <sup>5</sup><br>DD / MM / YYYY |   |
|                                      |                       |                                                           |                                              |                 |                                                   |                          |                                  |                                                        |                                 |                        |                                    |                               | 1                                                        | 1 |
|                                      |                       |                                                           |                                              |                 |                                                   |                          |                                  |                                                        |                                 |                        |                                    |                               | 2                                                        | 2 |
|                                      |                       |                                                           |                                              |                 |                                                   |                          |                                  |                                                        |                                 |                        |                                    |                               | 1                                                        | 1 |
|                                      |                       |                                                           |                                              |                 |                                                   |                          |                                  |                                                        |                                 |                        |                                    |                               | 2                                                        | 2 |
|                                      |                       |                                                           |                                              |                 |                                                   |                          |                                  |                                                        |                                 |                        |                                    |                               | 1                                                        | 1 |
|                                      |                       |                                                           |                                              |                 |                                                   |                          |                                  |                                                        |                                 |                        |                                    |                               | 2                                                        | 2 |
|                                      |                       |                                                           |                                              |                 |                                                   |                          |                                  |                                                        |                                 |                        |                                    |                               | 1                                                        | 1 |
|                                      |                       |                                                           |                                              |                 |                                                   |                          |                                  |                                                        |                                 |                        |                                    |                               | 2                                                        | 2 |
|                                      |                       |                                                           |                                              |                 |                                                   |                          |                                  |                                                        |                                 |                        |                                    |                               | 1                                                        | 1 |
|                                      |                       |                                                           |                                              |                 |                                                   |                          |                                  |                                                        |                                 |                        |                                    |                               | 2                                                        | 2 |
|                                      |                       |                                                           |                                              |                 |                                                   |                          |                                  |                                                        |                                 |                        |                                    |                               | 1                                                        | 1 |
|                                      |                       |                                                           |                                              |                 |                                                   |                          |                                  |                                                        |                                 |                        |                                    |                               | 2                                                        | 2 |
|                                      |                       |                                                           |                                              |                 |                                                   |                          |                                  |                                                        |                                 |                        |                                    |                               | 1                                                        | 1 |
|                                      |                       |                                                           |                                              |                 |                                                   |                          |                                  |                                                        |                                 |                        |                                    |                               | 2                                                        | 2 |
| TOTALS:                              |                       |                                                           |                                              |                 |                                                   |                          |                                  |                                                        | Total number positive:          | Total number pregnant: | Total number Diabetic:             | Total number positive:        |                                                          |   |

1. Place Barcode sticker from the laboratory form / write Barcode number eg. AAGX8459

2. Full detailed address of where the patient lives or can be reached during the day.

3. Use the coding on the instruction cover for TB symptoms (i.e. 1= Cough)

4. Write down a date the patient produced specimen

5. Write date when the test results were received by facility

Sub District: ..... Facility Name: .....

| TB Investigations                      |                                                              |                                                     |         |                      |                                           |                                     |                         |                          |                              |                           |                               | TB Confirmed Clients (DS-TB and DR-TB)                |                                       |                             | REMARKS            |                                                                     |
|----------------------------------------|--------------------------------------------------------------|-----------------------------------------------------|---------|----------------------|-------------------------------------------|-------------------------------------|-------------------------|--------------------------|------------------------------|---------------------------|-------------------------------|-------------------------------------------------------|---------------------------------------|-----------------------------|--------------------|---------------------------------------------------------------------|
| Bacteriological investigation          |                                                              |                                                     |         |                      |                                           | Non- Bacteriological Investigations |                         |                          |                              |                           |                               | Date Treatment Started <sup>7</sup><br>DD / MM / YYYY | Died before Treatment Start<br>(Tick) | Loss to follow up<br>(Tick) |                    | TPT Start Date <sup>8</sup><br>(for contacts, PLHIV) DD / MM / YYYY |
| Xpert<br>(1 <sup>st</sup> Test)        | Smear Microscopy<br>(Pos, Neg, Scanty, not done / no result) | TEST RESULT TURN AROUND TIME <sup>6</sup><br>(Tick) |         | Rif Susceptibility   | TB CULTURE / LPA / DST                    |                                     |                         | X-Ray<br>DD / MM / YYYY  | U-LAM<br>DD / MM / YYYY      | Mantoux<br>DD / MM / YYYY | Other Tests<br>DD / MM / YYYY |                                                       |                                       |                             |                    |                                                                     |
| Xpert<br>(2 <sup>nd</sup> test if any) | Grading<br>(bottom row)                                      | < 48hrs                                             | > 48hrs | R / S                | Date specimen collected<br>DD / MM / YYYY | Result<br>(Pos / Neg)               | Resistance<br>( R / H ) | Result                   | Result                       | Result                    | Result                        |                                                       |                                       |                             |                    |                                                                     |
| 1                                      |                                                              | 1                                                   | 1       |                      |                                           |                                     |                         |                          |                              |                           |                               |                                                       |                                       |                             |                    |                                                                     |
| 2                                      |                                                              | 2                                                   | 2       |                      |                                           |                                     |                         |                          |                              |                           |                               |                                                       |                                       |                             |                    |                                                                     |
| 1                                      |                                                              | 1                                                   | 1       |                      |                                           |                                     |                         |                          |                              |                           |                               |                                                       |                                       |                             |                    |                                                                     |
| 2                                      |                                                              | 2                                                   | 2       |                      |                                           |                                     |                         |                          |                              |                           |                               |                                                       |                                       |                             |                    |                                                                     |
| 1                                      |                                                              | 1                                                   | 1       |                      |                                           |                                     |                         |                          |                              |                           |                               |                                                       |                                       |                             |                    |                                                                     |
| 2                                      |                                                              | 2                                                   | 2       |                      |                                           |                                     |                         |                          |                              |                           |                               |                                                       |                                       |                             |                    |                                                                     |
| 1                                      |                                                              | 1                                                   | 1       |                      |                                           |                                     |                         |                          |                              |                           |                               |                                                       |                                       |                             |                    |                                                                     |
| 2                                      |                                                              | 2                                                   | 2       |                      |                                           |                                     |                         |                          |                              |                           |                               |                                                       |                                       |                             |                    |                                                                     |
| 1                                      |                                                              | 1                                                   | 1       |                      |                                           |                                     |                         |                          |                              |                           |                               |                                                       |                                       |                             |                    |                                                                     |
| 2                                      |                                                              | 2                                                   | 2       |                      |                                           |                                     |                         |                          |                              |                           |                               |                                                       |                                       |                             |                    |                                                                     |
| 1                                      |                                                              | 1                                                   | 1       |                      |                                           |                                     |                         |                          |                              |                           |                               |                                                       |                                       |                             |                    |                                                                     |
| 2                                      |                                                              | 2                                                   | 2       |                      |                                           |                                     |                         |                          |                              |                           |                               |                                                       |                                       |                             |                    |                                                                     |
| 1                                      |                                                              | 1                                                   | 1       |                      |                                           |                                     |                         |                          |                              |                           |                               |                                                       |                                       |                             |                    |                                                                     |
| 2                                      |                                                              | 2                                                   | 2       |                      |                                           |                                     |                         |                          |                              |                           |                               |                                                       |                                       |                             |                    |                                                                     |
| 1                                      |                                                              | 1                                                   | 1       |                      |                                           |                                     |                         |                          |                              |                           |                               |                                                       |                                       |                             |                    |                                                                     |
| 2                                      |                                                              | 2                                                   | 2       |                      |                                           |                                     |                         |                          |                              |                           |                               |                                                       |                                       |                             |                    |                                                                     |
| 1                                      |                                                              | 1                                                   | 1       |                      |                                           |                                     |                         |                          |                              |                           |                               |                                                       |                                       |                             |                    |                                                                     |
| 2                                      |                                                              | 2                                                   | 2       |                      |                                           |                                     |                         |                          |                              |                           |                               |                                                       |                                       |                             |                    |                                                                     |
| Total Xpert Positive:                  |                                                              |                                                     |         | Total Rif Resistance |                                           | Total tested Positive:              | Total MDR-TB:           | Total number suggestive: | Total number testedpositive: | Total number reactive:    | Total:                        | Total started Rx:                                     | Total died:                           | Total not on Rx:            | Total started TPT: |                                                                     |

6. Tick whether sputum results were back within 48hrs.

7. Write date on which the patient was initiated on Treatment.

8. Write a date for TPT start.

Compiled by: ..... Signature: ..... Date: ..... Verified by: ..... Signature: ..... Date: .....

## TUBERCULOSIS IDENTIFICATION REGISTER

District: .....

| Specimen Barcode Number <sup>1</sup> | Patient Folder Number | Surname<br>(Top row)<br><br>First name(s)<br>(Bottom row) | Date of birth<br>(Top row)<br>DD / MM / YYYY | Gender<br>M / F | Physical Home Address <sup>2</sup> /<br>Land Mark | Telephone /<br>Cellphone | TB symptoms<br>Identified | Risk Groups                |                                  |                                 |                        |                                    | TB Investigations             |                                                           |                                                             |
|--------------------------------------|-----------------------|-----------------------------------------------------------|----------------------------------------------|-----------------|---------------------------------------------------|--------------------------|---------------------------|----------------------------|----------------------------------|---------------------------------|------------------------|------------------------------------|-------------------------------|-----------------------------------------------------------|-------------------------------------------------------------|
|                                      |                       |                                                           | Age<br>(Bottom row)                          |                 |                                                   |                          |                           | Yes / No                   | Contact (Y / N)<br>(Top row)     | HIV Status<br>(Pos / Neg / Unk) | Pregnant<br>(Y / N)    | Diabetes Mellitus<br>(Y / N / Unk) | COVID-19<br>(Pos / Neg / Unk) | Bacteriological investigation                             |                                                             |
|                                      |                       |                                                           |                                              |                 |                                                   |                          |                           | If Yes (Code) <sup>3</sup> | DS/ DR- TB / unk<br>(Bottom row) |                                 |                        |                                    |                               | Date Specimen<br>collected <sup>4</sup><br>DD / MM / YYYY | Date test Result<br>received <sup>5</sup><br>DD / MM / YYYY |
|                                      |                       |                                                           |                                              |                 |                                                   |                          |                           |                            |                                  |                                 |                        |                                    |                               | 1                                                         | 1                                                           |
|                                      |                       |                                                           |                                              |                 |                                                   |                          |                           |                            |                                  |                                 |                        |                                    |                               | 2                                                         | 2                                                           |
|                                      |                       |                                                           |                                              |                 |                                                   |                          |                           |                            |                                  |                                 |                        |                                    |                               | 1                                                         | 1                                                           |
|                                      |                       |                                                           |                                              |                 |                                                   |                          |                           |                            |                                  |                                 |                        |                                    |                               | 2                                                         | 2                                                           |
|                                      |                       |                                                           |                                              |                 |                                                   |                          |                           |                            |                                  |                                 |                        |                                    |                               | 1                                                         | 1                                                           |
|                                      |                       |                                                           |                                              |                 |                                                   |                          |                           |                            |                                  |                                 |                        |                                    |                               | 2                                                         | 2                                                           |
|                                      |                       |                                                           |                                              |                 |                                                   |                          |                           |                            |                                  |                                 |                        |                                    |                               | 1                                                         | 1                                                           |
|                                      |                       |                                                           |                                              |                 |                                                   |                          |                           |                            |                                  |                                 |                        |                                    |                               | 2                                                         | 2                                                           |
|                                      |                       |                                                           |                                              |                 |                                                   |                          |                           |                            |                                  |                                 |                        |                                    |                               | 1                                                         | 1                                                           |
|                                      |                       |                                                           |                                              |                 |                                                   |                          |                           |                            |                                  |                                 |                        |                                    |                               | 2                                                         | 2                                                           |
|                                      |                       |                                                           |                                              |                 |                                                   |                          |                           |                            |                                  |                                 |                        |                                    |                               | 1                                                         | 1                                                           |
|                                      |                       |                                                           |                                              |                 |                                                   |                          |                           |                            |                                  |                                 |                        |                                    |                               | 2                                                         | 2                                                           |
|                                      |                       |                                                           |                                              |                 |                                                   |                          |                           |                            |                                  |                                 |                        |                                    |                               | 1                                                         | 1                                                           |
|                                      |                       |                                                           |                                              |                 |                                                   |                          |                           |                            |                                  |                                 |                        |                                    |                               | 2                                                         | 2                                                           |
| TOTALS:                              |                       |                                                           |                                              |                 |                                                   |                          |                           |                            | Total number positive:           | Total number pregnant:          | Total number Diabetic: | Total number positive:             |                               |                                                           |                                                             |

1. Place Barcode sticker from the laboratory form / write Barcode number eg. AAGX8459

2. Full detailed address of where the patient lives or can be reached during the day.

3. Use the coding on the instruction cover for TB symptoms (i.e. 1= Cough)

4. Write down a date the patient produced specimen

5. Write date when the test results were received by facility

Sub District: ..... Facility Name: .....

| TB Investigations                      |                                                              |                                                     |         |                      |                                           |                                     |                        |                          |                              |                           |                               | TB Confirmed Clients (DS-TB and DR-TB)                |                                       |                             | TPT Start Date <sup>8</sup><br>(for contacts, PLHIV) DD / MM / YYYY | REMARKS |
|----------------------------------------|--------------------------------------------------------------|-----------------------------------------------------|---------|----------------------|-------------------------------------------|-------------------------------------|------------------------|--------------------------|------------------------------|---------------------------|-------------------------------|-------------------------------------------------------|---------------------------------------|-----------------------------|---------------------------------------------------------------------|---------|
| Bacteriological investigation          |                                                              |                                                     |         |                      |                                           | Non- Bacteriological Investigations |                        |                          |                              |                           |                               | Date Treatment Started <sup>7</sup><br>DD / MM / YYYY | Died before Treatment Start<br>(Tick) | Loss to follow up<br>(Tick) |                                                                     |         |
| Xpert<br>(1 <sup>st</sup> Test)        | Smear Microscopy<br>(Pos, Neg, Scanty, not done / no result) | TEST RESULT TURN AROUND TIME <sup>6</sup><br>(Tick) |         | Rif Susceptibility   | TB CULTURE / LPA / DST                    |                                     |                        | X-Ray<br>DD / MM / YYYY  | U-LAM<br>DD / MM / YYYY      | Mantoux<br>DD / MM / YYYY | Other Tests<br>DD / MM / YYYY |                                                       |                                       |                             |                                                                     |         |
| Xpert<br>(2 <sup>nd</sup> test if any) | Grading<br>(bottom row)                                      | < 48hrs                                             | > 48hrs | R / S                | Date specimen collected<br>DD / MM / YYYY | Result<br>(Pos / Neg)               | Resistance<br>( R / H) | Result                   | Result                       | Result                    | Result                        |                                                       |                                       |                             |                                                                     |         |
| 1                                      |                                                              | 1                                                   | 1       |                      |                                           |                                     |                        |                          |                              |                           |                               |                                                       |                                       |                             |                                                                     |         |
| 2                                      |                                                              | 2                                                   | 2       |                      |                                           |                                     |                        |                          |                              |                           |                               |                                                       |                                       |                             |                                                                     |         |
| 1                                      |                                                              | 1                                                   | 1       |                      |                                           |                                     |                        |                          |                              |                           |                               |                                                       |                                       |                             |                                                                     |         |
| 2                                      |                                                              | 2                                                   | 2       |                      |                                           |                                     |                        |                          |                              |                           |                               |                                                       |                                       |                             |                                                                     |         |
| 1                                      |                                                              | 1                                                   | 1       |                      |                                           |                                     |                        |                          |                              |                           |                               |                                                       |                                       |                             |                                                                     |         |
| 2                                      |                                                              | 2                                                   | 2       |                      |                                           |                                     |                        |                          |                              |                           |                               |                                                       |                                       |                             |                                                                     |         |
| 1                                      |                                                              | 1                                                   | 1       |                      |                                           |                                     |                        |                          |                              |                           |                               |                                                       |                                       |                             |                                                                     |         |
| 2                                      |                                                              | 2                                                   | 2       |                      |                                           |                                     |                        |                          |                              |                           |                               |                                                       |                                       |                             |                                                                     |         |
| 1                                      |                                                              | 1                                                   | 1       |                      |                                           |                                     |                        |                          |                              |                           |                               |                                                       |                                       |                             |                                                                     |         |
| 2                                      |                                                              | 2                                                   | 2       |                      |                                           |                                     |                        |                          |                              |                           |                               |                                                       |                                       |                             |                                                                     |         |
| 1                                      |                                                              | 1                                                   | 1       |                      |                                           |                                     |                        |                          |                              |                           |                               |                                                       |                                       |                             |                                                                     |         |
| 2                                      |                                                              | 2                                                   | 2       |                      |                                           |                                     |                        |                          |                              |                           |                               |                                                       |                                       |                             |                                                                     |         |
| 1                                      |                                                              | 1                                                   | 1       |                      |                                           |                                     |                        |                          |                              |                           |                               |                                                       |                                       |                             |                                                                     |         |
| 2                                      |                                                              | 2                                                   | 2       |                      |                                           |                                     |                        |                          |                              |                           |                               |                                                       |                                       |                             |                                                                     |         |
| 1                                      |                                                              | 1                                                   | 1       |                      |                                           |                                     |                        |                          |                              |                           |                               |                                                       |                                       |                             |                                                                     |         |
| 2                                      |                                                              | 2                                                   | 2       |                      |                                           |                                     |                        |                          |                              |                           |                               |                                                       |                                       |                             |                                                                     |         |
| 1                                      |                                                              | 1                                                   | 1       |                      |                                           |                                     |                        |                          |                              |                           |                               |                                                       |                                       |                             |                                                                     |         |
| 2                                      |                                                              | 2                                                   | 2       |                      |                                           |                                     |                        |                          |                              |                           |                               |                                                       |                                       |                             |                                                                     |         |
| Total Xpert Positive:                  |                                                              |                                                     |         | Total Rif Resistance |                                           | Total tested Positive:              | Total MDR-TB:          | Total number suggestive: | Total number testedpositive: | Total number reactive:    | Total:                        | Total started Rx:                                     | Total died:                           | Total not on Rx:            | Total started TPT:                                                  |         |

6. Tick whether sputum results were back within 48hrs.

7. Write date on which the patient was initiated on Treatment.

8. Write a date for TPT start.

Compiled by: ..... Signature: ..... Date: ..... Verified by: ..... Signature: ..... Date: .....

## TUBERCULOSIS IDENTIFICATION REGISTER

District: .....

| Specimen Barcode Number <sup>1</sup> | Patient Folder Number | Surname<br>(Top row)<br><br>First name(s)<br>(Bottom row) | Date of birth<br>(Top row)<br>DD / MM / YYYY | Gender<br>M / F | Physical Home Address <sup>2</sup> /<br>Land Mark | Telephone /<br>Cellphone | TB symptoms<br>Identified | Risk Groups                |                                  |                                 |                              |                                    | TB Investigations             |                                                           |                                                             |
|--------------------------------------|-----------------------|-----------------------------------------------------------|----------------------------------------------|-----------------|---------------------------------------------------|--------------------------|---------------------------|----------------------------|----------------------------------|---------------------------------|------------------------------|------------------------------------|-------------------------------|-----------------------------------------------------------|-------------------------------------------------------------|
|                                      |                       |                                                           | Age<br>(Bottom row)                          |                 |                                                   |                          |                           | Yes / No                   | Contact (Y / N)<br>(Top row)     | HIV Status<br>(Pos / Neg / Unk) | Pregnant<br>(Y / N)          | Diabetes Mellitus<br>(Y / N / Unk) | COVID-19<br>(Pos / Neg / Unk) | Bacteriological investigation                             |                                                             |
|                                      |                       |                                                           |                                              |                 |                                                   |                          |                           | If Yes (Code) <sup>3</sup> | DS/ DR- TB / unk<br>(Bottom row) |                                 |                              |                                    |                               | BASELINE TESTS                                            |                                                             |
|                                      |                       |                                                           |                                              |                 |                                                   |                          |                           |                            |                                  |                                 |                              |                                    |                               | Date Specimen<br>collected <sup>4</sup><br>DD / MM / YYYY | Date test Result<br>received <sup>5</sup><br>DD / MM / YYYY |
|                                      |                       |                                                           |                                              |                 |                                                   |                          |                           |                            |                                  |                                 |                              |                                    | 1                             | 1                                                         |                                                             |
|                                      |                       |                                                           |                                              |                 |                                                   |                          |                           |                            |                                  |                                 |                              |                                    | 2                             | 2                                                         |                                                             |
|                                      |                       |                                                           |                                              |                 |                                                   |                          |                           |                            |                                  |                                 |                              |                                    | 1                             | 1                                                         |                                                             |
|                                      |                       |                                                           |                                              |                 |                                                   |                          |                           |                            |                                  |                                 |                              |                                    | 2                             | 2                                                         |                                                             |
|                                      |                       |                                                           |                                              |                 |                                                   |                          |                           |                            |                                  |                                 |                              |                                    | 1                             | 1                                                         |                                                             |
|                                      |                       |                                                           |                                              |                 |                                                   |                          |                           |                            |                                  |                                 |                              |                                    | 2                             | 2                                                         |                                                             |
|                                      |                       |                                                           |                                              |                 |                                                   |                          |                           |                            |                                  |                                 |                              |                                    | 1                             | 1                                                         |                                                             |
|                                      |                       |                                                           |                                              |                 |                                                   |                          |                           |                            |                                  |                                 |                              |                                    | 2                             | 2                                                         |                                                             |
|                                      |                       |                                                           |                                              |                 |                                                   |                          |                           |                            |                                  |                                 |                              |                                    | 1                             | 1                                                         |                                                             |
|                                      |                       |                                                           |                                              |                 |                                                   |                          |                           |                            |                                  |                                 |                              |                                    | 2                             | 2                                                         |                                                             |
|                                      |                       |                                                           |                                              |                 |                                                   |                          |                           |                            |                                  |                                 |                              |                                    | 1                             | 1                                                         |                                                             |
|                                      |                       |                                                           |                                              |                 |                                                   |                          |                           |                            |                                  |                                 |                              |                                    | 2                             | 2                                                         |                                                             |
|                                      |                       |                                                           |                                              |                 |                                                   |                          |                           |                            |                                  |                                 |                              |                                    | 1                             | 1                                                         |                                                             |
|                                      |                       |                                                           |                                              |                 |                                                   |                          |                           |                            |                                  |                                 |                              |                                    | 2                             | 2                                                         |                                                             |
| TOTALS:                              |                       |                                                           |                                              |                 |                                                   |                          |                           |                            | Total<br>number<br>positive:     | Total<br>number<br>pregnant:    | Total<br>number<br>Diabetic: | Total<br>number<br>positive:       |                               |                                                           |                                                             |

1. Place Barcode sticker from the laboratory form / write Barcode number eg. AAGX8459

2. Full detailed address of where the patient lives or can be reached during the day.

3. Use the coding on the instruction cover for TB symptoms (i.e. 1= Cough)

4. Write down a date the patient produced specimen

5. Write date when the test results were received by facility

Sub District: ..... Facility Name: .....

| TB Investigations                      |                                                              |                                                     |         |                      |                                           |                                     |                        |                          |                              |                           |                               | TB Confirmed Clients (DS-TB and DR-TB)                |                                       |                             | TPT Start Date <sup>8</sup><br>(for contacts, PLHIV) DD / MM / YYYY | REMARKS |
|----------------------------------------|--------------------------------------------------------------|-----------------------------------------------------|---------|----------------------|-------------------------------------------|-------------------------------------|------------------------|--------------------------|------------------------------|---------------------------|-------------------------------|-------------------------------------------------------|---------------------------------------|-----------------------------|---------------------------------------------------------------------|---------|
| Bacteriological investigation          |                                                              |                                                     |         |                      |                                           | Non- Bacteriological Investigations |                        |                          |                              |                           |                               | Date Treatment Started <sup>7</sup><br>DD / MM / YYYY | Died before Treatment Start<br>(Tick) | Loss to follow up<br>(Tick) |                                                                     |         |
| Xpert<br>(1 <sup>st</sup> Test)        | Smear Microscopy<br>(Pos, Neg, Scanty, not done / no result) | TEST RESULT TURN AROUND TIME <sup>6</sup><br>(Tick) |         | Rif Susceptibility   | TB CULTURE / LPA / DST                    |                                     |                        | X-Ray<br>DD / MM / YYYY  | U-LAM<br>DD / MM / YYYY      | Mantoux<br>DD / MM / YYYY | Other Tests<br>DD / MM / YYYY |                                                       |                                       |                             |                                                                     |         |
| Xpert<br>(2 <sup>nd</sup> test if any) | Grading<br>(bottom row)                                      | < 48hrs                                             | > 48hrs | R / S                | Date specimen collected<br>DD / MM / YYYY | Result<br>(Pos / Neg)               | Resistance<br>( R / H) | Result                   | Result                       | Result                    | Result                        |                                                       |                                       |                             |                                                                     |         |
| 1                                      |                                                              | 1                                                   | 1       |                      |                                           |                                     |                        |                          |                              |                           |                               |                                                       |                                       |                             |                                                                     |         |
| 2                                      |                                                              | 2                                                   | 2       |                      |                                           |                                     |                        |                          |                              |                           |                               |                                                       |                                       |                             |                                                                     |         |
| 1                                      |                                                              | 1                                                   | 1       |                      |                                           |                                     |                        |                          |                              |                           |                               |                                                       |                                       |                             |                                                                     |         |
| 2                                      |                                                              | 2                                                   | 2       |                      |                                           |                                     |                        |                          |                              |                           |                               |                                                       |                                       |                             |                                                                     |         |
| 1                                      |                                                              | 1                                                   | 1       |                      |                                           |                                     |                        |                          |                              |                           |                               |                                                       |                                       |                             |                                                                     |         |
| 2                                      |                                                              | 2                                                   | 2       |                      |                                           |                                     |                        |                          |                              |                           |                               |                                                       |                                       |                             |                                                                     |         |
| 1                                      |                                                              | 1                                                   | 1       |                      |                                           |                                     |                        |                          |                              |                           |                               |                                                       |                                       |                             |                                                                     |         |
| 2                                      |                                                              | 2                                                   | 2       |                      |                                           |                                     |                        |                          |                              |                           |                               |                                                       |                                       |                             |                                                                     |         |
| 1                                      |                                                              | 1                                                   | 1       |                      |                                           |                                     |                        |                          |                              |                           |                               |                                                       |                                       |                             |                                                                     |         |
| 2                                      |                                                              | 2                                                   | 2       |                      |                                           |                                     |                        |                          |                              |                           |                               |                                                       |                                       |                             |                                                                     |         |
| 1                                      |                                                              | 1                                                   | 1       |                      |                                           |                                     |                        |                          |                              |                           |                               |                                                       |                                       |                             |                                                                     |         |
| 2                                      |                                                              | 2                                                   | 2       |                      |                                           |                                     |                        |                          |                              |                           |                               |                                                       |                                       |                             |                                                                     |         |
| 1                                      |                                                              | 1                                                   | 1       |                      |                                           |                                     |                        |                          |                              |                           |                               |                                                       |                                       |                             |                                                                     |         |
| 2                                      |                                                              | 2                                                   | 2       |                      |                                           |                                     |                        |                          |                              |                           |                               |                                                       |                                       |                             |                                                                     |         |
| 1                                      |                                                              | 1                                                   | 1       |                      |                                           |                                     |                        |                          |                              |                           |                               |                                                       |                                       |                             |                                                                     |         |
| 2                                      |                                                              | 2                                                   | 2       |                      |                                           |                                     |                        |                          |                              |                           |                               |                                                       |                                       |                             |                                                                     |         |
| 1                                      |                                                              | 1                                                   | 1       |                      |                                           |                                     |                        |                          |                              |                           |                               |                                                       |                                       |                             |                                                                     |         |
| 2                                      |                                                              | 2                                                   | 2       |                      |                                           |                                     |                        |                          |                              |                           |                               |                                                       |                                       |                             |                                                                     |         |
| Total Xpert Positive:                  |                                                              |                                                     |         | Total Rif Resistance |                                           | Total tested Positive:              | Total MDR-TB:          | Total number suggestive: | Total number testedpositive: | Total number reactive:    | Total:                        | Total started Rx:                                     | Total died:                           | Total not on Rx:            | Total started TPT:                                                  |         |

6. Tick whether sputum results were back within 48hrs.

7. Write date on which the patient was initiated on Treatment.

8. Write a date for TPT start.

Compiled by: ..... Signature: ..... Date: ..... Verified by: ..... Signature: ..... Date: .....

## TUBERCULOSIS IDENTIFICATION REGISTER

District: .....

| Specimen Barcode Number <sup>1</sup> | Patient Folder Number | Surname<br>(Top row)<br><br>First name(s)<br>(Bottom row) | Date of birth<br>(Top row)<br>DD / MM / YYYY | Gender<br>M / F | Physical Home Address <sup>2</sup> /<br>Land Mark | Telephone /<br>Cellphone | TB symptoms<br>Identified | Risk Groups                |                                  |                                 |                              |                                    | TB Investigations             |                                                           |                                                             |
|--------------------------------------|-----------------------|-----------------------------------------------------------|----------------------------------------------|-----------------|---------------------------------------------------|--------------------------|---------------------------|----------------------------|----------------------------------|---------------------------------|------------------------------|------------------------------------|-------------------------------|-----------------------------------------------------------|-------------------------------------------------------------|
|                                      |                       |                                                           | Age<br>(Bottom row)                          |                 |                                                   |                          |                           | Yes / No                   | Contact (Y / N)<br>(Top row)     | HIV Status<br>(Pos / Neg / Unk) | Pregnant<br>(Y / N)          | Diabetes Mellitus<br>(Y / N / Unk) | COVID-19<br>(Pos / Neg / Unk) | Bacteriological investigation                             |                                                             |
|                                      |                       |                                                           |                                              |                 |                                                   |                          |                           | If Yes (Code) <sup>3</sup> | DS/ DR- TB / unk<br>(Bottom row) |                                 |                              |                                    |                               | Date Specimen<br>collected <sup>4</sup><br>DD / MM / YYYY | Date test Result<br>received <sup>5</sup><br>DD / MM / YYYY |
|                                      |                       |                                                           |                                              |                 |                                                   |                          |                           |                            |                                  |                                 |                              |                                    |                               | 1                                                         | 1                                                           |
|                                      |                       |                                                           |                                              |                 |                                                   |                          |                           |                            |                                  |                                 |                              |                                    |                               | 2                                                         | 2                                                           |
|                                      |                       |                                                           |                                              |                 |                                                   |                          |                           |                            |                                  |                                 |                              |                                    |                               | 1                                                         | 1                                                           |
|                                      |                       |                                                           |                                              |                 |                                                   |                          |                           |                            |                                  |                                 |                              |                                    |                               | 2                                                         | 2                                                           |
|                                      |                       |                                                           |                                              |                 |                                                   |                          |                           |                            |                                  |                                 |                              |                                    |                               | 1                                                         | 1                                                           |
|                                      |                       |                                                           |                                              |                 |                                                   |                          |                           |                            |                                  |                                 |                              |                                    |                               | 2                                                         | 2                                                           |
|                                      |                       |                                                           |                                              |                 |                                                   |                          |                           |                            |                                  |                                 |                              |                                    |                               | 1                                                         | 1                                                           |
|                                      |                       |                                                           |                                              |                 |                                                   |                          |                           |                            |                                  |                                 |                              |                                    |                               | 2                                                         | 2                                                           |
|                                      |                       |                                                           |                                              |                 |                                                   |                          |                           |                            |                                  |                                 |                              |                                    |                               | 1                                                         | 1                                                           |
|                                      |                       |                                                           |                                              |                 |                                                   |                          |                           |                            |                                  |                                 |                              |                                    |                               | 2                                                         | 2                                                           |
|                                      |                       |                                                           |                                              |                 |                                                   |                          |                           |                            |                                  |                                 |                              |                                    |                               | 1                                                         | 1                                                           |
|                                      |                       |                                                           |                                              |                 |                                                   |                          |                           |                            |                                  |                                 |                              |                                    |                               | 2                                                         | 2                                                           |
|                                      |                       |                                                           |                                              |                 |                                                   |                          |                           |                            |                                  |                                 |                              |                                    |                               | 1                                                         | 1                                                           |
|                                      |                       |                                                           |                                              |                 |                                                   |                          |                           |                            |                                  |                                 |                              |                                    |                               | 2                                                         | 2                                                           |
| TOTALS:                              |                       |                                                           |                                              |                 |                                                   |                          |                           |                            | Total<br>number<br>positive:     | Total<br>number<br>pregnant:    | Total<br>number<br>Diabetic: | Total<br>number<br>positive:       |                               |                                                           |                                                             |

1. Place Barcode sticker from the laboratory form / write Barcode number eg. AAGX8459

2. Full detailed address of where the patient lives or can be reached during the day.

3. Use the coding on the instruction cover for TB symptoms (i.e. 1= Cough)

4. Write down a date the patient produced specimen

5. Write date when the test results were received by facility



Sub District: ..... Facility Name: .....

| TB Investigations                      |                                                              |                                                     |         |                      |                                           |                                     |                        |                          |                               |                           |                               | TB Confirmed Clients (DS-TB and DR-TB)                |                                       |                             | TPT Start Date <sup>8</sup><br>(for contacts, PLHIV) DD / MM / YYYY | REMARKS |
|----------------------------------------|--------------------------------------------------------------|-----------------------------------------------------|---------|----------------------|-------------------------------------------|-------------------------------------|------------------------|--------------------------|-------------------------------|---------------------------|-------------------------------|-------------------------------------------------------|---------------------------------------|-----------------------------|---------------------------------------------------------------------|---------|
| Bacteriological investigation          |                                                              |                                                     |         |                      |                                           | Non- Bacteriological Investigations |                        |                          |                               |                           |                               | Date Treatment Started <sup>7</sup><br>DD / MM / YYYY | Died before Treatment Start<br>(Tick) | Loss to follow up<br>(Tick) |                                                                     |         |
| Xpert<br>(1 <sup>st</sup> Test)        | Smear Microscopy<br>(Pos, Neg, Scanty, not done / no result) | TEST RESULT TURN AROUND TIME <sup>6</sup><br>(Tick) |         | Rif Susceptibility   | TB CULTURE / LPA / DST                    |                                     |                        | X-Ray<br>DD / MM / YYYY  | U-LAM<br>DD / MM / YYYY       | Mantoux<br>DD / MM / YYYY | Other Tests<br>DD / MM / YYYY |                                                       |                                       |                             |                                                                     |         |
| Xpert<br>(2 <sup>nd</sup> test if any) | Grading<br>(bottom row)                                      | < 48hrs                                             | > 48hrs | R / S                | Date specimen collected<br>DD / MM / YYYY | Result<br>(Pos / Neg)               | Resistance<br>( R / H) | Result                   | Result                        | Result                    | Result                        |                                                       |                                       |                             |                                                                     |         |
| 1                                      |                                                              | 1                                                   | 1       |                      |                                           |                                     |                        |                          |                               |                           |                               |                                                       |                                       |                             |                                                                     |         |
| 2                                      |                                                              | 2                                                   | 2       |                      |                                           |                                     |                        |                          |                               |                           |                               |                                                       |                                       |                             |                                                                     |         |
| 1                                      |                                                              | 1                                                   | 1       |                      |                                           |                                     |                        |                          |                               |                           |                               |                                                       |                                       |                             |                                                                     |         |
| 2                                      |                                                              | 2                                                   | 2       |                      |                                           |                                     |                        |                          |                               |                           |                               |                                                       |                                       |                             |                                                                     |         |
| 1                                      |                                                              | 1                                                   | 1       |                      |                                           |                                     |                        |                          |                               |                           |                               |                                                       |                                       |                             |                                                                     |         |
| 2                                      |                                                              | 2                                                   | 2       |                      |                                           |                                     |                        |                          |                               |                           |                               |                                                       |                                       |                             |                                                                     |         |
| 1                                      |                                                              | 1                                                   | 1       |                      |                                           |                                     |                        |                          |                               |                           |                               |                                                       |                                       |                             |                                                                     |         |
| 2                                      |                                                              | 2                                                   | 2       |                      |                                           |                                     |                        |                          |                               |                           |                               |                                                       |                                       |                             |                                                                     |         |
| 1                                      |                                                              | 1                                                   | 1       |                      |                                           |                                     |                        |                          |                               |                           |                               |                                                       |                                       |                             |                                                                     |         |
| 2                                      |                                                              | 2                                                   | 2       |                      |                                           |                                     |                        |                          |                               |                           |                               |                                                       |                                       |                             |                                                                     |         |
| 1                                      |                                                              | 1                                                   | 1       |                      |                                           |                                     |                        |                          |                               |                           |                               |                                                       |                                       |                             |                                                                     |         |
| 2                                      |                                                              | 2                                                   | 2       |                      |                                           |                                     |                        |                          |                               |                           |                               |                                                       |                                       |                             |                                                                     |         |
| 1                                      |                                                              | 1                                                   | 1       |                      |                                           |                                     |                        |                          |                               |                           |                               |                                                       |                                       |                             |                                                                     |         |
| 2                                      |                                                              | 2                                                   | 2       |                      |                                           |                                     |                        |                          |                               |                           |                               |                                                       |                                       |                             |                                                                     |         |
| 1                                      |                                                              | 1                                                   | 1       |                      |                                           |                                     |                        |                          |                               |                           |                               |                                                       |                                       |                             |                                                                     |         |
| 2                                      |                                                              | 2                                                   | 2       |                      |                                           |                                     |                        |                          |                               |                           |                               |                                                       |                                       |                             |                                                                     |         |
| 1                                      |                                                              | 1                                                   | 1       |                      |                                           |                                     |                        |                          |                               |                           |                               |                                                       |                                       |                             |                                                                     |         |
| 2                                      |                                                              | 2                                                   | 2       |                      |                                           |                                     |                        |                          |                               |                           |                               |                                                       |                                       |                             |                                                                     |         |
| Total Xpert Positive:                  |                                                              |                                                     |         | Total Rif Resistance |                                           | Total tested Positive:              | Total MDR-TB:          | Total number suggestive: | Total number tested positive: | Total number reactive:    | Total:                        | Total started Rx:                                     | Total died:                           | Total not on Rx:            | Total started TPT:                                                  |         |

6. Tick whether sputum results were back within 48hrs.

7. Write date on which the patient was initiated on Treatment.

8. Write a date for TPT start.

Compiled by: ..... Signature: ..... Date: ..... Verified by: ..... Signature: ..... Date: .....

## TUBERCULOSIS IDENTIFICATION REGISTER

District: .....

| Specimen Barcode Number <sup>1</sup> | Patient Folder Number | Surname<br>(Top row)<br><br>First name(s)<br>(Bottom row) | Date of birth<br>(Top row)<br>DD / MM / YYYY | Gender<br>M / F | Physical Home Address <sup>2</sup> /<br>Land Mark | Telephone /<br>Cellphone | TB symptoms Identified     | Risk Groups                      |                                 |                        |                                    |                               | TB Investigations                                      |                                                          |
|--------------------------------------|-----------------------|-----------------------------------------------------------|----------------------------------------------|-----------------|---------------------------------------------------|--------------------------|----------------------------|----------------------------------|---------------------------------|------------------------|------------------------------------|-------------------------------|--------------------------------------------------------|----------------------------------------------------------|
|                                      |                       |                                                           | Age<br>(Bottom row)                          |                 |                                                   |                          | Yes / No                   | Contact (Y / N)<br>(Top row)     | HIV Status<br>(Pos / Neg / Unk) | Pregnant<br>(Y / N)    | Diabetes Mellitus<br>(Y / N / Unk) | COVID-19<br>(Pos / Neg / Unk) | Bacteriological investigation                          |                                                          |
|                                      |                       |                                                           |                                              |                 |                                                   |                          | If Yes (Code) <sup>3</sup> | DS/ DR- TB / unk<br>(Bottom row) |                                 |                        |                                    |                               | BASELINE TESTS                                         |                                                          |
|                                      |                       |                                                           |                                              |                 |                                                   |                          |                            |                                  |                                 |                        |                                    |                               | Date Specimen collected <sup>4</sup><br>DD / MM / YYYY | Date test Result received <sup>5</sup><br>DD / MM / YYYY |
|                                      |                       |                                                           |                                              |                 |                                                   |                          |                            |                                  |                                 |                        |                                    |                               | 1                                                      | 1                                                        |
|                                      |                       |                                                           |                                              |                 |                                                   |                          |                            |                                  |                                 |                        |                                    |                               | 2                                                      | 2                                                        |
|                                      |                       |                                                           |                                              |                 |                                                   |                          |                            |                                  |                                 |                        |                                    |                               | 1                                                      | 1                                                        |
|                                      |                       |                                                           |                                              |                 |                                                   |                          |                            |                                  |                                 |                        |                                    |                               | 2                                                      | 2                                                        |
|                                      |                       |                                                           |                                              |                 |                                                   |                          |                            |                                  |                                 |                        |                                    |                               | 1                                                      | 1                                                        |
|                                      |                       |                                                           |                                              |                 |                                                   |                          |                            |                                  |                                 |                        |                                    |                               | 2                                                      | 2                                                        |
|                                      |                       |                                                           |                                              |                 |                                                   |                          |                            |                                  |                                 |                        |                                    |                               | 1                                                      | 1                                                        |
|                                      |                       |                                                           |                                              |                 |                                                   |                          |                            |                                  |                                 |                        |                                    |                               | 2                                                      | 2                                                        |
|                                      |                       |                                                           |                                              |                 |                                                   |                          |                            |                                  |                                 |                        |                                    |                               | 1                                                      | 1                                                        |
|                                      |                       |                                                           |                                              |                 |                                                   |                          |                            |                                  |                                 |                        |                                    |                               | 2                                                      | 2                                                        |
|                                      |                       |                                                           |                                              |                 |                                                   |                          |                            |                                  |                                 |                        |                                    |                               | 1                                                      | 1                                                        |
|                                      |                       |                                                           |                                              |                 |                                                   |                          |                            |                                  |                                 |                        |                                    |                               | 2                                                      | 2                                                        |
|                                      |                       |                                                           |                                              |                 |                                                   |                          |                            |                                  |                                 |                        |                                    |                               | 1                                                      | 1                                                        |
|                                      |                       |                                                           |                                              |                 |                                                   |                          |                            |                                  |                                 |                        |                                    |                               | 2                                                      | 2                                                        |
| TOTALS:                              |                       |                                                           |                                              |                 |                                                   |                          |                            |                                  | Total number positive:          | Total number pregnant: | Total number Diabetic:             | Total number positive:        |                                                        |                                                          |

1. Place Barcode sticker from the laboratory form / write Barcode number eg. AAGX8459

2. Full detailed address of where the patient lives or can be reached during the day.

3. Use the coding on the instruction cover for TB symptoms (i.e. 1= Cough)

4. Write down a date the patient produced specimen

5. Write date when the test results were received by facility

Sub District: ..... Facility Name: .....

| TB Investigations                      |                                                              |                                                     |         |                      |                                           |                                     |                         |                          |                              |                           |                               | TB Confirmed Clients (DS-TB and DR-TB)                |                                       |                             | REMARKS            |                                                                     |
|----------------------------------------|--------------------------------------------------------------|-----------------------------------------------------|---------|----------------------|-------------------------------------------|-------------------------------------|-------------------------|--------------------------|------------------------------|---------------------------|-------------------------------|-------------------------------------------------------|---------------------------------------|-----------------------------|--------------------|---------------------------------------------------------------------|
| Bacteriological investigation          |                                                              |                                                     |         |                      |                                           | Non- Bacteriological Investigations |                         |                          |                              |                           |                               | Date Treatment Started <sup>7</sup><br>DD / MM / YYYY | Died before Treatment Start<br>(Tick) | Loss to follow up<br>(Tick) |                    | TPT Start Date <sup>8</sup><br>(for contacts, PLHIV) DD / MM / YYYY |
| Xpert<br>(1 <sup>st</sup> Test)        | Smear Microscopy<br>(Pos, Neg, Scanty, not done / no result) | TEST RESULT TURN AROUND TIME <sup>6</sup><br>(Tick) |         | Rif Susceptibility   | TB CULTURE / LPA / DST                    |                                     |                         | X-Ray<br>DD / MM / YYYY  | U-LAM<br>DD / MM / YYYY      | Mantoux<br>DD / MM / YYYY | Other Tests<br>DD / MM / YYYY |                                                       |                                       |                             |                    |                                                                     |
| Xpert<br>(2 <sup>nd</sup> test if any) | Grading<br>(bottom row)                                      | < 48hrs                                             | > 48hrs | R / S                | Date specimen collected<br>DD / MM / YYYY | Result<br>(Pos / Neg)               | Resistance<br>( R / H ) | Result                   | Result                       | Result                    | Result                        |                                                       |                                       |                             |                    |                                                                     |
| 1                                      |                                                              | 1                                                   | 1       |                      |                                           |                                     |                         |                          |                              |                           |                               |                                                       |                                       |                             |                    |                                                                     |
| 2                                      |                                                              | 2                                                   | 2       |                      |                                           |                                     |                         |                          |                              |                           |                               |                                                       |                                       |                             |                    |                                                                     |
| 1                                      |                                                              | 1                                                   | 1       |                      |                                           |                                     |                         |                          |                              |                           |                               |                                                       |                                       |                             |                    |                                                                     |
| 2                                      |                                                              | 2                                                   | 2       |                      |                                           |                                     |                         |                          |                              |                           |                               |                                                       |                                       |                             |                    |                                                                     |
| 1                                      |                                                              | 1                                                   | 1       |                      |                                           |                                     |                         |                          |                              |                           |                               |                                                       |                                       |                             |                    |                                                                     |
| 2                                      |                                                              | 2                                                   | 2       |                      |                                           |                                     |                         |                          |                              |                           |                               |                                                       |                                       |                             |                    |                                                                     |
| 1                                      |                                                              | 1                                                   | 1       |                      |                                           |                                     |                         |                          |                              |                           |                               |                                                       |                                       |                             |                    |                                                                     |
| 2                                      |                                                              | 2                                                   | 2       |                      |                                           |                                     |                         |                          |                              |                           |                               |                                                       |                                       |                             |                    |                                                                     |
| 1                                      |                                                              | 1                                                   | 1       |                      |                                           |                                     |                         |                          |                              |                           |                               |                                                       |                                       |                             |                    |                                                                     |
| 2                                      |                                                              | 2                                                   | 2       |                      |                                           |                                     |                         |                          |                              |                           |                               |                                                       |                                       |                             |                    |                                                                     |
| 1                                      |                                                              | 1                                                   | 1       |                      |                                           |                                     |                         |                          |                              |                           |                               |                                                       |                                       |                             |                    |                                                                     |
| 2                                      |                                                              | 2                                                   | 2       |                      |                                           |                                     |                         |                          |                              |                           |                               |                                                       |                                       |                             |                    |                                                                     |
| 1                                      |                                                              | 1                                                   | 1       |                      |                                           |                                     |                         |                          |                              |                           |                               |                                                       |                                       |                             |                    |                                                                     |
| 2                                      |                                                              | 2                                                   | 2       |                      |                                           |                                     |                         |                          |                              |                           |                               |                                                       |                                       |                             |                    |                                                                     |
| 1                                      |                                                              | 1                                                   | 1       |                      |                                           |                                     |                         |                          |                              |                           |                               |                                                       |                                       |                             |                    |                                                                     |
| 2                                      |                                                              | 2                                                   | 2       |                      |                                           |                                     |                         |                          |                              |                           |                               |                                                       |                                       |                             |                    |                                                                     |
| 1                                      |                                                              | 1                                                   | 1       |                      |                                           |                                     |                         |                          |                              |                           |                               |                                                       |                                       |                             |                    |                                                                     |
| 2                                      |                                                              | 2                                                   | 2       |                      |                                           |                                     |                         |                          |                              |                           |                               |                                                       |                                       |                             |                    |                                                                     |
| Total Xpert Positive:                  |                                                              |                                                     |         | Total Rif Resistance |                                           | Total tested Positive:              | Total MDR-TB:           | Total number suggestive: | Total number testedpositive: | Total number reactive:    | Total:                        | Total started Rx:                                     | Total died:                           | Total not on Rx:            | Total started TPT: |                                                                     |

6. Tick whether sputum results were back within 48hrs.

7. Write date on which the patient was initiated on Treatment.

8. Write a date for TPT start.

Compiled by: ..... Signature: ..... Date: ..... Verified by: ..... Signature: ..... Date: .....

## TUBERCULOSIS IDENTIFICATION REGISTER

District: .....

| Specimen Barcode Number <sup>1</sup> | Patient Folder Number | Surname<br>(Top row)<br><br>First name(s)<br>(Bottom row) | Date of birth<br>(Top row)<br>DD / MM / YYYY | Gender<br>M / F | Physical Home Address <sup>2</sup> /<br>Land Mark | Telephone /<br>Cellphone | TB symptoms Identified     | Risk Groups                      |                                 |                        |                                    |                               | TB Investigations                                      |                                                          |
|--------------------------------------|-----------------------|-----------------------------------------------------------|----------------------------------------------|-----------------|---------------------------------------------------|--------------------------|----------------------------|----------------------------------|---------------------------------|------------------------|------------------------------------|-------------------------------|--------------------------------------------------------|----------------------------------------------------------|
|                                      |                       |                                                           | Age<br>(Bottom row)                          |                 |                                                   |                          | Yes / No                   | Contact (Y / N)<br>(Top row)     | HIV Status<br>(Pos / Neg / Unk) | Pregnant<br>(Y / N)    | Diabetes Mellitus<br>(Y / N / Unk) | COVID-19<br>(Pos / Neg / Unk) | Bacteriological investigation                          |                                                          |
|                                      |                       |                                                           |                                              |                 |                                                   |                          | If Yes (Code) <sup>3</sup> | DS/ DR- TB / unk<br>(Bottom row) |                                 |                        |                                    |                               | Date Specimen collected <sup>4</sup><br>DD / MM / YYYY | Date test Result received <sup>5</sup><br>DD / MM / YYYY |
|                                      |                       |                                                           |                                              |                 |                                                   |                          |                            |                                  |                                 |                        |                                    |                               | 1                                                      | 1                                                        |
|                                      |                       |                                                           |                                              |                 |                                                   |                          |                            |                                  |                                 |                        |                                    |                               | 2                                                      | 2                                                        |
|                                      |                       |                                                           |                                              |                 |                                                   |                          |                            |                                  |                                 |                        |                                    |                               | 1                                                      | 1                                                        |
|                                      |                       |                                                           |                                              |                 |                                                   |                          |                            |                                  |                                 |                        |                                    |                               | 2                                                      | 2                                                        |
|                                      |                       |                                                           |                                              |                 |                                                   |                          |                            |                                  |                                 |                        |                                    |                               | 1                                                      | 1                                                        |
|                                      |                       |                                                           |                                              |                 |                                                   |                          |                            |                                  |                                 |                        |                                    |                               | 2                                                      | 2                                                        |
|                                      |                       |                                                           |                                              |                 |                                                   |                          |                            |                                  |                                 |                        |                                    |                               | 1                                                      | 1                                                        |
|                                      |                       |                                                           |                                              |                 |                                                   |                          |                            |                                  |                                 |                        |                                    |                               | 2                                                      | 2                                                        |
|                                      |                       |                                                           |                                              |                 |                                                   |                          |                            |                                  |                                 |                        |                                    |                               | 1                                                      | 1                                                        |
|                                      |                       |                                                           |                                              |                 |                                                   |                          |                            |                                  |                                 |                        |                                    |                               | 2                                                      | 2                                                        |
|                                      |                       |                                                           |                                              |                 |                                                   |                          |                            |                                  |                                 |                        |                                    |                               | 1                                                      | 1                                                        |
|                                      |                       |                                                           |                                              |                 |                                                   |                          |                            |                                  |                                 |                        |                                    |                               | 2                                                      | 2                                                        |
|                                      |                       |                                                           |                                              |                 |                                                   |                          |                            |                                  |                                 |                        |                                    |                               | 1                                                      | 1                                                        |
|                                      |                       |                                                           |                                              |                 |                                                   |                          |                            |                                  |                                 |                        |                                    |                               | 2                                                      | 2                                                        |
| TOTALS:                              |                       |                                                           |                                              |                 |                                                   |                          |                            |                                  | Total number positive:          | Total number pregnant: | Total number Diabetic:             | Total number positive:        |                                                        |                                                          |

1. Place Barcode sticker from the laboratory form / write Barcode number eg. AAGX8459

2. Full detailed address of where the patient lives or can be reached during the day.

3. Use the coding on the instruction cover for TB symptoms (i.e. 1= Cough)

4. Write down a date the patient produced specimen

5. Write date when the test results were received by facility

Sub District: ..... Facility Name: .....

| TB Investigations                      |                                                              |                                                     |         |                      |                                           |                                     |                        |                          |                              |                           |                               | TB Confirmed Clients (DS-TB and DR-TB)                |                                       |                             | TPT Start Date <sup>8</sup><br>(for contacts, PLHIV) DD / MM / YYYY | REMARKS |
|----------------------------------------|--------------------------------------------------------------|-----------------------------------------------------|---------|----------------------|-------------------------------------------|-------------------------------------|------------------------|--------------------------|------------------------------|---------------------------|-------------------------------|-------------------------------------------------------|---------------------------------------|-----------------------------|---------------------------------------------------------------------|---------|
| Bacteriological investigation          |                                                              |                                                     |         |                      |                                           | Non- Bacteriological Investigations |                        |                          |                              |                           |                               | Date Treatment Started <sup>7</sup><br>DD / MM / YYYY | Died before Treatment Start<br>(Tick) | Loss to follow up<br>(Tick) |                                                                     |         |
| Xpert<br>(1 <sup>st</sup> Test)        | Smear Microscopy<br>(Pos, Neg, Scanty, not done / no result) | TEST RESULT TURN AROUND TIME <sup>6</sup><br>(Tick) |         | Rif Susceptibility   | TB CULTURE / LPA / DST                    |                                     |                        | X-Ray<br>DD / MM / YYYY  | U-LAM<br>DD / MM / YYYY      | Mantoux<br>DD / MM / YYYY | Other Tests<br>DD / MM / YYYY |                                                       |                                       |                             |                                                                     |         |
| Xpert<br>(2 <sup>nd</sup> test if any) | Grading<br>(bottom row)                                      | < 48hrs                                             | > 48hrs | R / S                | Date specimen collected<br>DD / MM / YYYY | Result<br>(Pos / Neg)               | Resistance<br>( R / H) | Result                   | Result                       | Result                    | Result                        |                                                       |                                       |                             |                                                                     |         |
| 1                                      |                                                              | 1                                                   | 1       |                      |                                           |                                     |                        |                          |                              |                           |                               |                                                       |                                       |                             |                                                                     |         |
| 2                                      |                                                              | 2                                                   | 2       |                      |                                           |                                     |                        |                          |                              |                           |                               |                                                       |                                       |                             |                                                                     |         |
| 1                                      |                                                              | 1                                                   | 1       |                      |                                           |                                     |                        |                          |                              |                           |                               |                                                       |                                       |                             |                                                                     |         |
| 2                                      |                                                              | 2                                                   | 2       |                      |                                           |                                     |                        |                          |                              |                           |                               |                                                       |                                       |                             |                                                                     |         |
| 1                                      |                                                              | 1                                                   | 1       |                      |                                           |                                     |                        |                          |                              |                           |                               |                                                       |                                       |                             |                                                                     |         |
| 2                                      |                                                              | 2                                                   | 2       |                      |                                           |                                     |                        |                          |                              |                           |                               |                                                       |                                       |                             |                                                                     |         |
| 1                                      |                                                              | 1                                                   | 1       |                      |                                           |                                     |                        |                          |                              |                           |                               |                                                       |                                       |                             |                                                                     |         |
| 2                                      |                                                              | 2                                                   | 2       |                      |                                           |                                     |                        |                          |                              |                           |                               |                                                       |                                       |                             |                                                                     |         |
| 1                                      |                                                              | 1                                                   | 1       |                      |                                           |                                     |                        |                          |                              |                           |                               |                                                       |                                       |                             |                                                                     |         |
| 2                                      |                                                              | 2                                                   | 2       |                      |                                           |                                     |                        |                          |                              |                           |                               |                                                       |                                       |                             |                                                                     |         |
| 1                                      |                                                              | 1                                                   | 1       |                      |                                           |                                     |                        |                          |                              |                           |                               |                                                       |                                       |                             |                                                                     |         |
| 2                                      |                                                              | 2                                                   | 2       |                      |                                           |                                     |                        |                          |                              |                           |                               |                                                       |                                       |                             |                                                                     |         |
| 1                                      |                                                              | 1                                                   | 1       |                      |                                           |                                     |                        |                          |                              |                           |                               |                                                       |                                       |                             |                                                                     |         |
| 2                                      |                                                              | 2                                                   | 2       |                      |                                           |                                     |                        |                          |                              |                           |                               |                                                       |                                       |                             |                                                                     |         |
| 1                                      |                                                              | 1                                                   | 1       |                      |                                           |                                     |                        |                          |                              |                           |                               |                                                       |                                       |                             |                                                                     |         |
| 2                                      |                                                              | 2                                                   | 2       |                      |                                           |                                     |                        |                          |                              |                           |                               |                                                       |                                       |                             |                                                                     |         |
| 1                                      |                                                              | 1                                                   | 1       |                      |                                           |                                     |                        |                          |                              |                           |                               |                                                       |                                       |                             |                                                                     |         |
| 2                                      |                                                              | 2                                                   | 2       |                      |                                           |                                     |                        |                          |                              |                           |                               |                                                       |                                       |                             |                                                                     |         |
| Total Xpert Positive:                  |                                                              |                                                     |         | Total Rif Resistance |                                           | Total tested Positive:              | Total MDR-TB:          | Total number suggestive: | Total number testedpositive: | Total number reactive:    | Total:                        | Total started Rx:                                     | Total died:                           | Total not on Rx:            | Total started TPT:                                                  |         |

6. Tick whether sputum results were back within 48hrs.

7. Write date on which the patient was initiated on Treatment.

8. Write a date for TPT start.

Compiled by: ..... Signature: ..... Date: ..... Verified by: ..... Signature: ..... Date: .....

## TUBERCULOSIS IDENTIFICATION REGISTER

District: .....

| Specimen Barcode Number <sup>1</sup> | Patient Folder Number | Surname<br>(Top row)<br><br>First name(s)<br>(Bottom row) | Date of birth<br>(Top row)<br>DD / MM / YYYY | Gender<br>M / F | Physical Home Address <sup>2</sup> /<br>Land Mark | Telephone /<br>Cellphone | TB symptoms Identified           | Risk Groups                                            |                                 |                        |                                    |                               | TB Investigations                                        |   |
|--------------------------------------|-----------------------|-----------------------------------------------------------|----------------------------------------------|-----------------|---------------------------------------------------|--------------------------|----------------------------------|--------------------------------------------------------|---------------------------------|------------------------|------------------------------------|-------------------------------|----------------------------------------------------------|---|
|                                      |                       |                                                           | Age<br>(Bottom row)                          |                 |                                                   |                          | Yes / No                         | Contact (Y / N)<br>(Top row)                           | HIV Status<br>(Pos / Neg / Unk) | Pregnant<br>(Y / N)    | Diabetes Mellitus<br>(Y / N / Unk) | COVID-19<br>(Pos / Neg / Unk) | Bacteriological investigation                            |   |
|                                      |                       |                                                           | If Yes (Code) <sup>3</sup>                   |                 |                                                   |                          | DS/ DR- TB / unk<br>(Bottom row) | Date Specimen collected <sup>4</sup><br>DD / MM / YYYY |                                 |                        |                                    |                               | Date test Result received <sup>5</sup><br>DD / MM / YYYY |   |
|                                      |                       |                                                           |                                              |                 |                                                   |                          |                                  |                                                        |                                 |                        |                                    |                               | 1                                                        | 1 |
|                                      |                       |                                                           |                                              |                 |                                                   |                          |                                  |                                                        |                                 |                        |                                    |                               | 2                                                        | 2 |
|                                      |                       |                                                           |                                              |                 |                                                   |                          |                                  |                                                        |                                 |                        |                                    |                               | 1                                                        | 1 |
|                                      |                       |                                                           |                                              |                 |                                                   |                          |                                  |                                                        |                                 |                        |                                    |                               | 2                                                        | 2 |
|                                      |                       |                                                           |                                              |                 |                                                   |                          |                                  |                                                        |                                 |                        |                                    |                               | 1                                                        | 1 |
|                                      |                       |                                                           |                                              |                 |                                                   |                          |                                  |                                                        |                                 |                        |                                    |                               | 2                                                        | 2 |
|                                      |                       |                                                           |                                              |                 |                                                   |                          |                                  |                                                        |                                 |                        |                                    |                               | 1                                                        | 1 |
|                                      |                       |                                                           |                                              |                 |                                                   |                          |                                  |                                                        |                                 |                        |                                    |                               | 2                                                        | 2 |
|                                      |                       |                                                           |                                              |                 |                                                   |                          |                                  |                                                        |                                 |                        |                                    |                               | 1                                                        | 1 |
|                                      |                       |                                                           |                                              |                 |                                                   |                          |                                  |                                                        |                                 |                        |                                    |                               | 2                                                        | 2 |
|                                      |                       |                                                           |                                              |                 |                                                   |                          |                                  |                                                        |                                 |                        |                                    |                               | 1                                                        | 1 |
|                                      |                       |                                                           |                                              |                 |                                                   |                          |                                  |                                                        |                                 |                        |                                    |                               | 2                                                        | 2 |
|                                      |                       |                                                           |                                              |                 |                                                   |                          |                                  |                                                        |                                 |                        |                                    |                               | 1                                                        | 1 |
|                                      |                       |                                                           |                                              |                 |                                                   |                          |                                  |                                                        |                                 |                        |                                    |                               | 2                                                        | 2 |
| TOTALS:                              |                       |                                                           |                                              |                 |                                                   |                          |                                  |                                                        | Total number positive:          | Total number pregnant: | Total number Diabetic:             | Total number positive:        |                                                          |   |

1. Place Barcode sticker from the laboratory form / write Barcode number eg. AAGX8459

2. Full detailed address of where the patient lives or can be reached during the day.

3. Use the coding on the instruction cover for TB symptoms (i.e. 1= Cough)

4. Write down a date the patient produced specimen

5. Write date when the test results were received by facility

Sub District: ..... Facility Name: .....

| TB Investigations                      |                                                              |                                                     |         |                      |                                           |                                     |                         |                          |                              |                           |                               | TB Confirmed Clients (DS-TB and DR-TB)                |                                       |                             | REMARKS            |                                                                    |
|----------------------------------------|--------------------------------------------------------------|-----------------------------------------------------|---------|----------------------|-------------------------------------------|-------------------------------------|-------------------------|--------------------------|------------------------------|---------------------------|-------------------------------|-------------------------------------------------------|---------------------------------------|-----------------------------|--------------------|--------------------------------------------------------------------|
| Bacteriological investigation          |                                                              |                                                     |         |                      |                                           | Non- Bacteriological Investigations |                         |                          |                              |                           |                               | Date Treatment Started <sup>7</sup><br>DD / MM / YYYY | Died before Treatment Start<br>(Tick) | Loss to follow up<br>(Tick) |                    | TPT Start Date <sup>8</sup><br>(for contacts, PLHV) DD / MM / YYYY |
| Xpert<br>(1 <sup>st</sup> Test)        | Smear Microscopy<br>(Pos, Neg, Scanty, not done / no result) | TEST RESULT TURN AROUND TIME <sup>6</sup><br>(Tick) |         | Rif Susceptibility   | TB CULTURE / LPA / DST                    |                                     |                         | X-Ray<br>DD / MM / YYYY  | U-LAM<br>DD / MM / YYYY      | Mantoux<br>DD / MM / YYYY | Other Tests<br>DD / MM / YYYY |                                                       |                                       |                             |                    |                                                                    |
| Xpert<br>(2 <sup>nd</sup> test if any) | Grading<br>(bottom row)                                      | < 48hrs                                             | > 48hrs | R / S                | Date specimen collected<br>DD / MM / YYYY | Result<br>(Pos / Neg)               | Resistance<br>( R / H ) | Result                   | Result                       | Result                    | Result                        |                                                       |                                       |                             |                    |                                                                    |
| 1                                      |                                                              | 1                                                   | 1       |                      |                                           |                                     |                         |                          |                              |                           |                               |                                                       |                                       |                             |                    |                                                                    |
| 2                                      |                                                              | 2                                                   | 2       |                      |                                           |                                     |                         |                          |                              |                           |                               |                                                       |                                       |                             |                    |                                                                    |
| 1                                      |                                                              | 1                                                   | 1       |                      |                                           |                                     |                         |                          |                              |                           |                               |                                                       |                                       |                             |                    |                                                                    |
| 2                                      |                                                              | 2                                                   | 2       |                      |                                           |                                     |                         |                          |                              |                           |                               |                                                       |                                       |                             |                    |                                                                    |
| 1                                      |                                                              | 1                                                   | 1       |                      |                                           |                                     |                         |                          |                              |                           |                               |                                                       |                                       |                             |                    |                                                                    |
| 2                                      |                                                              | 2                                                   | 2       |                      |                                           |                                     |                         |                          |                              |                           |                               |                                                       |                                       |                             |                    |                                                                    |
| 1                                      |                                                              | 1                                                   | 1       |                      |                                           |                                     |                         |                          |                              |                           |                               |                                                       |                                       |                             |                    |                                                                    |
| 2                                      |                                                              | 2                                                   | 2       |                      |                                           |                                     |                         |                          |                              |                           |                               |                                                       |                                       |                             |                    |                                                                    |
| 1                                      |                                                              | 1                                                   | 1       |                      |                                           |                                     |                         |                          |                              |                           |                               |                                                       |                                       |                             |                    |                                                                    |
| 2                                      |                                                              | 2                                                   | 2       |                      |                                           |                                     |                         |                          |                              |                           |                               |                                                       |                                       |                             |                    |                                                                    |
| 1                                      |                                                              | 1                                                   | 1       |                      |                                           |                                     |                         |                          |                              |                           |                               |                                                       |                                       |                             |                    |                                                                    |
| 2                                      |                                                              | 2                                                   | 2       |                      |                                           |                                     |                         |                          |                              |                           |                               |                                                       |                                       |                             |                    |                                                                    |
| 1                                      |                                                              | 1                                                   | 1       |                      |                                           |                                     |                         |                          |                              |                           |                               |                                                       |                                       |                             |                    |                                                                    |
| 2                                      |                                                              | 2                                                   | 2       |                      |                                           |                                     |                         |                          |                              |                           |                               |                                                       |                                       |                             |                    |                                                                    |
| 1                                      |                                                              | 1                                                   | 1       |                      |                                           |                                     |                         |                          |                              |                           |                               |                                                       |                                       |                             |                    |                                                                    |
| 2                                      |                                                              | 2                                                   | 2       |                      |                                           |                                     |                         |                          |                              |                           |                               |                                                       |                                       |                             |                    |                                                                    |
| 1                                      |                                                              | 1                                                   | 1       |                      |                                           |                                     |                         |                          |                              |                           |                               |                                                       |                                       |                             |                    |                                                                    |
| 2                                      |                                                              | 2                                                   | 2       |                      |                                           |                                     |                         |                          |                              |                           |                               |                                                       |                                       |                             |                    |                                                                    |
| Total Xpert Positive:                  |                                                              |                                                     |         | Total Rif Resistance |                                           | Total tested Positive:              | Total MDR-TB:           | Total number suggestive: | Total number testedpositive: | Total number reactive:    | Total:                        | Total started Rx:                                     | Total died:                           | Total not on Rx:            | Total started TPT: |                                                                    |

6. Tick whether sputum results were back within 48hrs.

7. Write date on which the patient was initiated on Treatment.

8. Write a date for TPT start.

Compiled by: ..... Signature: ..... Date: ..... Verified by: ..... Signature: ..... Date: .....

## TUBERCULOSIS IDENTIFICATION REGISTER

District: .....

| Specimen Barcode Number <sup>1</sup> | Patient Folder Number | Surname<br>(Top row)<br><br>First name(s)<br>(Bottom row) | Date of birth<br>(Top row)<br>DD / MM / YYYY | Gender<br>M / F | Physical Home Address <sup>2</sup> /<br>Land Mark | Telephone /<br>Cellphone | TB symptoms<br>Identified | Risk Groups                |                                  |                                 |                        |                                    | TB Investigations             |                                                           |                                                             |
|--------------------------------------|-----------------------|-----------------------------------------------------------|----------------------------------------------|-----------------|---------------------------------------------------|--------------------------|---------------------------|----------------------------|----------------------------------|---------------------------------|------------------------|------------------------------------|-------------------------------|-----------------------------------------------------------|-------------------------------------------------------------|
|                                      |                       |                                                           | Age<br>(Bottom row)                          |                 |                                                   |                          |                           | Yes / No                   | Contact (Y / N)<br>(Top row)     | HIV Status<br>(Pos / Neg / Unk) | Pregnant<br>(Y / N)    | Diabetes Mellitus<br>(Y / N / Unk) | COVID-19<br>(Pos / Neg / Unk) | Bacteriological investigation                             |                                                             |
|                                      |                       |                                                           |                                              |                 |                                                   |                          |                           | If Yes (Code) <sup>3</sup> | DS/ DR- TB / unk<br>(Bottom row) |                                 |                        |                                    |                               | Date Specimen<br>collected <sup>4</sup><br>DD / MM / YYYY | Date test Result<br>received <sup>5</sup><br>DD / MM / YYYY |
|                                      |                       |                                                           |                                              |                 |                                                   |                          |                           |                            |                                  |                                 |                        |                                    |                               | 1                                                         | 1                                                           |
|                                      |                       |                                                           |                                              |                 |                                                   |                          |                           |                            |                                  |                                 |                        |                                    |                               | 2                                                         | 2                                                           |
|                                      |                       |                                                           |                                              |                 |                                                   |                          |                           |                            |                                  |                                 |                        |                                    |                               | 1                                                         | 1                                                           |
|                                      |                       |                                                           |                                              |                 |                                                   |                          |                           |                            |                                  |                                 |                        |                                    |                               | 2                                                         | 2                                                           |
|                                      |                       |                                                           |                                              |                 |                                                   |                          |                           |                            |                                  |                                 |                        |                                    |                               | 1                                                         | 1                                                           |
|                                      |                       |                                                           |                                              |                 |                                                   |                          |                           |                            |                                  |                                 |                        |                                    |                               | 2                                                         | 2                                                           |
|                                      |                       |                                                           |                                              |                 |                                                   |                          |                           |                            |                                  |                                 |                        |                                    |                               | 1                                                         | 1                                                           |
|                                      |                       |                                                           |                                              |                 |                                                   |                          |                           |                            |                                  |                                 |                        |                                    |                               | 2                                                         | 2                                                           |
|                                      |                       |                                                           |                                              |                 |                                                   |                          |                           |                            |                                  |                                 |                        |                                    |                               | 1                                                         | 1                                                           |
|                                      |                       |                                                           |                                              |                 |                                                   |                          |                           |                            |                                  |                                 |                        |                                    |                               | 2                                                         | 2                                                           |
|                                      |                       |                                                           |                                              |                 |                                                   |                          |                           |                            |                                  |                                 |                        |                                    |                               | 1                                                         | 1                                                           |
|                                      |                       |                                                           |                                              |                 |                                                   |                          |                           |                            |                                  |                                 |                        |                                    |                               | 2                                                         | 2                                                           |
|                                      |                       |                                                           |                                              |                 |                                                   |                          |                           |                            |                                  |                                 |                        |                                    |                               | 1                                                         | 1                                                           |
|                                      |                       |                                                           |                                              |                 |                                                   |                          |                           |                            |                                  |                                 |                        |                                    |                               | 2                                                         | 2                                                           |
| TOTALS:                              |                       |                                                           |                                              |                 |                                                   |                          |                           |                            | Total number positive:           | Total number pregnant:          | Total number Diabetic: | Total number positive:             |                               |                                                           |                                                             |

1. Place Barcode sticker from the laboratory form / write Barcode number eg. AAGX8459

2. Full detailed address of where the patient lives or can be reached during the day.

3. Use the coding on the instruction cover for TB symptoms (i.e. 1= Cough)

4. Write down a date the patient produced specimen

5. Write date when the test results were received by facility



Sub District: ..... Facility Name: .....

| TB Investigations                      |                                                              |                                                     |         |                      |                                           |                                     |                        |                          |                               |                           |                               | TB Confirmed Clients (DS-TB and DR-TB)                |                                       |                             | REMARKS            |                                                                     |
|----------------------------------------|--------------------------------------------------------------|-----------------------------------------------------|---------|----------------------|-------------------------------------------|-------------------------------------|------------------------|--------------------------|-------------------------------|---------------------------|-------------------------------|-------------------------------------------------------|---------------------------------------|-----------------------------|--------------------|---------------------------------------------------------------------|
| Bacteriological investigation          |                                                              |                                                     |         |                      |                                           | Non- Bacteriological Investigations |                        |                          |                               |                           |                               | Date Treatment Started <sup>7</sup><br>DD / MM / YYYY | Died before Treatment Start<br>(Tick) | Loss to follow up<br>(Tick) |                    | TPT Start Date <sup>8</sup><br>(for contacts, PLHIV) DD / MM / YYYY |
| Xpert<br>(1 <sup>st</sup> Test)        | Smear Microscopy<br>(Pos, Neg, Scanty, not done / no result) | TEST RESULT TURN AROUND TIME <sup>6</sup><br>(Tick) |         | Rif Susceptibility   | TB CULTURE / LPA / DST                    |                                     |                        | X-Ray<br>DD / MM / YYYY  | U-LAM<br>DD / MM / YYYY       | Mantoux<br>DD / MM / YYYY | Other Tests<br>DD / MM / YYYY |                                                       |                                       |                             |                    |                                                                     |
| Xpert<br>(2 <sup>nd</sup> test if any) | Grading<br>(bottom row)                                      | < 48hrs                                             | > 48hrs | R / S                | Date specimen collected<br>DD / MM / YYYY | Result<br>(Pos / Neg)               | Resistance<br>( R / H) | Result                   | Result                        | Result                    | Result                        |                                                       |                                       |                             |                    |                                                                     |
| 1                                      |                                                              | 1                                                   | 1       |                      |                                           |                                     |                        |                          |                               |                           |                               |                                                       |                                       |                             |                    |                                                                     |
| 2                                      |                                                              | 2                                                   | 2       |                      |                                           |                                     |                        |                          |                               |                           |                               |                                                       |                                       |                             |                    |                                                                     |
| 1                                      |                                                              | 1                                                   | 1       |                      |                                           |                                     |                        |                          |                               |                           |                               |                                                       |                                       |                             |                    |                                                                     |
| 2                                      |                                                              | 2                                                   | 2       |                      |                                           |                                     |                        |                          |                               |                           |                               |                                                       |                                       |                             |                    |                                                                     |
| 1                                      |                                                              | 1                                                   | 1       |                      |                                           |                                     |                        |                          |                               |                           |                               |                                                       |                                       |                             |                    |                                                                     |
| 2                                      |                                                              | 2                                                   | 2       |                      |                                           |                                     |                        |                          |                               |                           |                               |                                                       |                                       |                             |                    |                                                                     |
| 1                                      |                                                              | 1                                                   | 1       |                      |                                           |                                     |                        |                          |                               |                           |                               |                                                       |                                       |                             |                    |                                                                     |
| 2                                      |                                                              | 2                                                   | 2       |                      |                                           |                                     |                        |                          |                               |                           |                               |                                                       |                                       |                             |                    |                                                                     |
| 1                                      |                                                              | 1                                                   | 1       |                      |                                           |                                     |                        |                          |                               |                           |                               |                                                       |                                       |                             |                    |                                                                     |
| 2                                      |                                                              | 2                                                   | 2       |                      |                                           |                                     |                        |                          |                               |                           |                               |                                                       |                                       |                             |                    |                                                                     |
| 1                                      |                                                              | 1                                                   | 1       |                      |                                           |                                     |                        |                          |                               |                           |                               |                                                       |                                       |                             |                    |                                                                     |
| 2                                      |                                                              | 2                                                   | 2       |                      |                                           |                                     |                        |                          |                               |                           |                               |                                                       |                                       |                             |                    |                                                                     |
| 1                                      |                                                              | 1                                                   | 1       |                      |                                           |                                     |                        |                          |                               |                           |                               |                                                       |                                       |                             |                    |                                                                     |
| 2                                      |                                                              | 2                                                   | 2       |                      |                                           |                                     |                        |                          |                               |                           |                               |                                                       |                                       |                             |                    |                                                                     |
| 1                                      |                                                              | 1                                                   | 1       |                      |                                           |                                     |                        |                          |                               |                           |                               |                                                       |                                       |                             |                    |                                                                     |
| 2                                      |                                                              | 2                                                   | 2       |                      |                                           |                                     |                        |                          |                               |                           |                               |                                                       |                                       |                             |                    |                                                                     |
| 1                                      |                                                              | 1                                                   | 1       |                      |                                           |                                     |                        |                          |                               |                           |                               |                                                       |                                       |                             |                    |                                                                     |
| 2                                      |                                                              | 2                                                   | 2       |                      |                                           |                                     |                        |                          |                               |                           |                               |                                                       |                                       |                             |                    |                                                                     |
| Total Xpert Positive:                  |                                                              |                                                     |         | Total Rif Resistance |                                           | Total tested Positive:              | Total MDR-TB:          | Total number suggestive: | Total number tested positive: | Total number reactive:    | Total:                        | Total started Rx:                                     | Total died:                           | Total not on Rx:            | Total started TPT: |                                                                     |

6. Tick whether sputum results were back within 48hrs.

7. Write date on which the patient was initiated on Treatment.

8. Write a date for TPT start.

Compiled by: ..... Signature: ..... Date: ..... Verified by: ..... Signature: ..... Date: .....

## TUBERCULOSIS IDENTIFICATION REGISTER

District: .....

| Specimen Barcode Number <sup>1</sup> | Patient Folder Number | Surname<br>(Top row)<br><br>First name(s)<br>(Bottom row) | Date of birth<br>(Top row)<br>DD / MM / YYYY | Gender<br>M / F | Physical Home Address <sup>2</sup> /<br>Land Mark | Telephone /<br>Cellphone | TB symptoms Identified     | Risk Groups                      |                                 |                        |                                    |                               | TB Investigations                                      |                                                          |
|--------------------------------------|-----------------------|-----------------------------------------------------------|----------------------------------------------|-----------------|---------------------------------------------------|--------------------------|----------------------------|----------------------------------|---------------------------------|------------------------|------------------------------------|-------------------------------|--------------------------------------------------------|----------------------------------------------------------|
|                                      |                       |                                                           | Age<br>(Bottom row)                          |                 |                                                   |                          | Yes / No                   | Contact (Y / N)<br>(Top row)     | HIV Status<br>(Pos / Neg / Unk) | Pregnant<br>(Y / N)    | Diabetes Mellitus<br>(Y / N / Unk) | COVID-19<br>(Pos / Neg / Unk) | Bacteriological investigation                          |                                                          |
|                                      |                       |                                                           |                                              |                 |                                                   |                          | If Yes (Code) <sup>3</sup> | DS/ DR- TB / unk<br>(Bottom row) |                                 |                        |                                    |                               | BASELINE TESTS                                         |                                                          |
|                                      |                       |                                                           |                                              |                 |                                                   |                          |                            |                                  |                                 |                        |                                    |                               | Date Specimen collected <sup>4</sup><br>DD / MM / YYYY | Date test Result received <sup>5</sup><br>DD / MM / YYYY |
|                                      |                       |                                                           |                                              |                 |                                                   |                          |                            |                                  |                                 |                        |                                    |                               | 1                                                      | 1                                                        |
|                                      |                       |                                                           |                                              |                 |                                                   |                          |                            |                                  |                                 |                        |                                    |                               | 2                                                      | 2                                                        |
|                                      |                       |                                                           |                                              |                 |                                                   |                          |                            |                                  |                                 |                        |                                    |                               | 1                                                      | 1                                                        |
|                                      |                       |                                                           |                                              |                 |                                                   |                          |                            |                                  |                                 |                        |                                    |                               | 2                                                      | 2                                                        |
|                                      |                       |                                                           |                                              |                 |                                                   |                          |                            |                                  |                                 |                        |                                    |                               | 1                                                      | 1                                                        |
|                                      |                       |                                                           |                                              |                 |                                                   |                          |                            |                                  |                                 |                        |                                    |                               | 2                                                      | 2                                                        |
|                                      |                       |                                                           |                                              |                 |                                                   |                          |                            |                                  |                                 |                        |                                    |                               | 1                                                      | 1                                                        |
|                                      |                       |                                                           |                                              |                 |                                                   |                          |                            |                                  |                                 |                        |                                    |                               | 2                                                      | 2                                                        |
|                                      |                       |                                                           |                                              |                 |                                                   |                          |                            |                                  |                                 |                        |                                    |                               | 1                                                      | 1                                                        |
|                                      |                       |                                                           |                                              |                 |                                                   |                          |                            |                                  |                                 |                        |                                    |                               | 2                                                      | 2                                                        |
|                                      |                       |                                                           |                                              |                 |                                                   |                          |                            |                                  |                                 |                        |                                    |                               | 1                                                      | 1                                                        |
|                                      |                       |                                                           |                                              |                 |                                                   |                          |                            |                                  |                                 |                        |                                    |                               | 2                                                      | 2                                                        |
|                                      |                       |                                                           |                                              |                 |                                                   |                          |                            |                                  |                                 |                        |                                    |                               | 1                                                      | 1                                                        |
|                                      |                       |                                                           |                                              |                 |                                                   |                          |                            |                                  |                                 |                        |                                    |                               | 2                                                      | 2                                                        |
| TOTALS:                              |                       |                                                           |                                              |                 |                                                   |                          |                            |                                  | Total number positive:          | Total number pregnant: | Total number Diabetic:             | Total number positive:        |                                                        |                                                          |

1. Place Barcode sticker from the laboratory form / write Barcode number eg. AAGX8459

2. Full detailed address of where the patient lives or can be reached during the day.

3. Use the coding on the instruction cover for TB symptoms (i.e. 1= Cough)

4. Write down a date the patient produced specimen

5. Write date when the test results were received by facility

Sub District: ..... Facility Name: .....

| TB Investigations                      |                                                              |                                                     |         |                      |                                           |                                     |                        |                          |                              |                           |                               | TB Confirmed Clients (DS-TB and DR-TB)                |                                       |                             | TPT Start Date <sup>8</sup><br>(for contacts, PLHIV) DD / MM / YYYY | REMARKS |
|----------------------------------------|--------------------------------------------------------------|-----------------------------------------------------|---------|----------------------|-------------------------------------------|-------------------------------------|------------------------|--------------------------|------------------------------|---------------------------|-------------------------------|-------------------------------------------------------|---------------------------------------|-----------------------------|---------------------------------------------------------------------|---------|
| Bacteriological investigation          |                                                              |                                                     |         |                      |                                           | Non- Bacteriological Investigations |                        |                          |                              |                           |                               | Date Treatment Started <sup>7</sup><br>DD / MM / YYYY | Died before Treatment Start<br>(Tick) | Loss to follow up<br>(Tick) |                                                                     |         |
| Xpert<br>(1 <sup>st</sup> Test)        | Smear Microscopy<br>(Pos, Neg, Scanty, not done / no result) | TEST RESULT TURN AROUND TIME <sup>6</sup><br>(Tick) |         | Rif Susceptibility   | TB CULTURE / LPA / DST                    |                                     |                        | X-Ray<br>DD / MM / YYYY  | U-LAM<br>DD / MM / YYYY      | Mantoux<br>DD / MM / YYYY | Other Tests<br>DD / MM / YYYY |                                                       |                                       |                             |                                                                     |         |
| Xpert<br>(2 <sup>nd</sup> test if any) | Grading<br>(bottom row)                                      | < 48hrs                                             | > 48hrs | R / S                | Date specimen collected<br>DD / MM / YYYY | Result<br>(Pos / Neg)               | Resistance<br>( R / H) | Result                   | Result                       | Result                    | Result                        |                                                       |                                       |                             |                                                                     |         |
| 1                                      |                                                              | 1                                                   | 1       |                      |                                           |                                     |                        |                          |                              |                           |                               |                                                       |                                       |                             |                                                                     |         |
| 2                                      |                                                              | 2                                                   | 2       |                      |                                           |                                     |                        |                          |                              |                           |                               |                                                       |                                       |                             |                                                                     |         |
| 1                                      |                                                              | 1                                                   | 1       |                      |                                           |                                     |                        |                          |                              |                           |                               |                                                       |                                       |                             |                                                                     |         |
| 2                                      |                                                              | 2                                                   | 2       |                      |                                           |                                     |                        |                          |                              |                           |                               |                                                       |                                       |                             |                                                                     |         |
| 1                                      |                                                              | 1                                                   | 1       |                      |                                           |                                     |                        |                          |                              |                           |                               |                                                       |                                       |                             |                                                                     |         |
| 2                                      |                                                              | 2                                                   | 2       |                      |                                           |                                     |                        |                          |                              |                           |                               |                                                       |                                       |                             |                                                                     |         |
| 1                                      |                                                              | 1                                                   | 1       |                      |                                           |                                     |                        |                          |                              |                           |                               |                                                       |                                       |                             |                                                                     |         |
| 2                                      |                                                              | 2                                                   | 2       |                      |                                           |                                     |                        |                          |                              |                           |                               |                                                       |                                       |                             |                                                                     |         |
| 1                                      |                                                              | 1                                                   | 1       |                      |                                           |                                     |                        |                          |                              |                           |                               |                                                       |                                       |                             |                                                                     |         |
| 2                                      |                                                              | 2                                                   | 2       |                      |                                           |                                     |                        |                          |                              |                           |                               |                                                       |                                       |                             |                                                                     |         |
| 1                                      |                                                              | 1                                                   | 1       |                      |                                           |                                     |                        |                          |                              |                           |                               |                                                       |                                       |                             |                                                                     |         |
| 2                                      |                                                              | 2                                                   | 2       |                      |                                           |                                     |                        |                          |                              |                           |                               |                                                       |                                       |                             |                                                                     |         |
| 1                                      |                                                              | 1                                                   | 1       |                      |                                           |                                     |                        |                          |                              |                           |                               |                                                       |                                       |                             |                                                                     |         |
| 2                                      |                                                              | 2                                                   | 2       |                      |                                           |                                     |                        |                          |                              |                           |                               |                                                       |                                       |                             |                                                                     |         |
| 1                                      |                                                              | 1                                                   | 1       |                      |                                           |                                     |                        |                          |                              |                           |                               |                                                       |                                       |                             |                                                                     |         |
| 2                                      |                                                              | 2                                                   | 2       |                      |                                           |                                     |                        |                          |                              |                           |                               |                                                       |                                       |                             |                                                                     |         |
| 1                                      |                                                              | 1                                                   | 1       |                      |                                           |                                     |                        |                          |                              |                           |                               |                                                       |                                       |                             |                                                                     |         |
| 2                                      |                                                              | 2                                                   | 2       |                      |                                           |                                     |                        |                          |                              |                           |                               |                                                       |                                       |                             |                                                                     |         |
| Total Xpert Positive:                  |                                                              |                                                     |         | Total Rif Resistance |                                           | Total tested Positive:              | Total MDR-TB:          | Total number suggestive: | Total number testedpositive: | Total number reactive:    | Total:                        | Total started Rx:                                     | Total died:                           | Total not on Rx:            | Total started TPT:                                                  |         |

6. Tick whether sputum results were back within 48hrs.

7. Write date on which the patient was initiated on Treatment.

8. Write a date for TPT start.

Compiled by: ..... Signature: ..... Date: ..... Verified by: ..... Signature: ..... Date: .....

## TUBERCULOSIS IDENTIFICATION REGISTER

District: .....

| Specimen Barcode Number <sup>1</sup> | Patient Folder Number | Surname<br>(Top row)<br><br>First name(s)<br>(Bottom row) | Date of birth<br>(Top row)<br>DD / MM / YYYY | Gender<br>M / F | Physical Home Address <sup>2</sup> /<br>Land Mark | Telephone /<br>Cellphone | TB symptoms Identified     | Risk Groups                      |                                 |                        |                                    |                               | TB Investigations                                      |                                                          |
|--------------------------------------|-----------------------|-----------------------------------------------------------|----------------------------------------------|-----------------|---------------------------------------------------|--------------------------|----------------------------|----------------------------------|---------------------------------|------------------------|------------------------------------|-------------------------------|--------------------------------------------------------|----------------------------------------------------------|
|                                      |                       |                                                           | Age<br>(Bottom row)                          |                 |                                                   |                          | Yes / No                   | Contact (Y / N)<br>(Top row)     | HIV Status<br>(Pos / Neg / Unk) | Pregnant<br>(Y / N)    | Diabetes Mellitus<br>(Y / N / Unk) | COVID-19<br>(Pos / Neg / Unk) | Bacteriological investigation                          |                                                          |
|                                      |                       |                                                           |                                              |                 |                                                   |                          | If Yes (Code) <sup>3</sup> | DS/ DR- TB / unk<br>(Bottom row) |                                 |                        |                                    |                               | BASELINE TESTS                                         |                                                          |
|                                      |                       |                                                           |                                              |                 |                                                   |                          |                            |                                  |                                 |                        |                                    |                               | Date Specimen collected <sup>4</sup><br>DD / MM / YYYY | Date test Result received <sup>5</sup><br>DD / MM / YYYY |
|                                      |                       |                                                           |                                              |                 |                                                   |                          |                            |                                  |                                 |                        |                                    |                               | 1                                                      | 1                                                        |
|                                      |                       |                                                           |                                              |                 |                                                   |                          |                            |                                  |                                 |                        |                                    |                               | 2                                                      | 2                                                        |
|                                      |                       |                                                           |                                              |                 |                                                   |                          |                            |                                  |                                 |                        |                                    |                               | 1                                                      | 1                                                        |
|                                      |                       |                                                           |                                              |                 |                                                   |                          |                            |                                  |                                 |                        |                                    |                               | 2                                                      | 2                                                        |
|                                      |                       |                                                           |                                              |                 |                                                   |                          |                            |                                  |                                 |                        |                                    |                               | 1                                                      | 1                                                        |
|                                      |                       |                                                           |                                              |                 |                                                   |                          |                            |                                  |                                 |                        |                                    |                               | 2                                                      | 2                                                        |
|                                      |                       |                                                           |                                              |                 |                                                   |                          |                            |                                  |                                 |                        |                                    |                               | 1                                                      | 1                                                        |
|                                      |                       |                                                           |                                              |                 |                                                   |                          |                            |                                  |                                 |                        |                                    |                               | 2                                                      | 2                                                        |
|                                      |                       |                                                           |                                              |                 |                                                   |                          |                            |                                  |                                 |                        |                                    |                               | 1                                                      | 1                                                        |
|                                      |                       |                                                           |                                              |                 |                                                   |                          |                            |                                  |                                 |                        |                                    |                               | 2                                                      | 2                                                        |
|                                      |                       |                                                           |                                              |                 |                                                   |                          |                            |                                  |                                 |                        |                                    |                               | 1                                                      | 1                                                        |
|                                      |                       |                                                           |                                              |                 |                                                   |                          |                            |                                  |                                 |                        |                                    |                               | 2                                                      | 2                                                        |
|                                      |                       |                                                           |                                              |                 |                                                   |                          |                            |                                  |                                 |                        |                                    |                               | 1                                                      | 1                                                        |
|                                      |                       |                                                           |                                              |                 |                                                   |                          |                            |                                  |                                 |                        |                                    |                               | 2                                                      | 2                                                        |
| TOTALS:                              |                       |                                                           |                                              |                 |                                                   |                          |                            |                                  | Total number positive:          | Total number pregnant: | Total number Diabetic:             | Total number positive:        |                                                        |                                                          |

1. Place Barcode sticker from the laboratory form / write Barcode number eg. AAGX8459

2. Full detailed address of where the patient lives or can be reached during the day.

3. Use the coding on the instruction cover for TB symptoms (i.e. 1= Cough)

4. Write down a date the patient produced specimen

5. Write date when the test results were received by facility

Sub District: ..... Facility Name: .....

| TB Investigations                      |                                                              |                                                     |         |                      |                                           |                                     |                        |                          |                              |                           |                               | TB Confirmed Clients (DS-TB and DR-TB)                |                                       |                             | TPT Start Date <sup>8</sup><br>(for contacts, PLHIV) DD / MM / YYYY | REMARKS |
|----------------------------------------|--------------------------------------------------------------|-----------------------------------------------------|---------|----------------------|-------------------------------------------|-------------------------------------|------------------------|--------------------------|------------------------------|---------------------------|-------------------------------|-------------------------------------------------------|---------------------------------------|-----------------------------|---------------------------------------------------------------------|---------|
| Bacteriological investigation          |                                                              |                                                     |         |                      |                                           | Non- Bacteriological Investigations |                        |                          |                              |                           |                               | Date Treatment Started <sup>7</sup><br>DD / MM / YYYY | Died before Treatment Start<br>(Tick) | Loss to follow up<br>(Tick) |                                                                     |         |
| Xpert<br>(1 <sup>st</sup> Test)        | Smear Microscopy<br>(Pos, Neg, Scanty, not done / no result) | TEST RESULT TURN AROUND TIME <sup>6</sup><br>(Tick) |         | Rif Susceptibility   | TB CULTURE / LPA / DST                    |                                     |                        | X-Ray<br>DD / MM / YYYY  | U-LAM<br>DD / MM / YYYY      | Mantoux<br>DD / MM / YYYY | Other Tests<br>DD / MM / YYYY |                                                       |                                       |                             |                                                                     |         |
| Xpert<br>(2 <sup>nd</sup> test if any) | Grading<br>(bottom row)                                      | < 48hrs                                             | > 48hrs | R / S                | Date specimen collected<br>DD / MM / YYYY | Result<br>(Pos / Neg)               | Resistance<br>( R / H) | Result                   | Result                       | Result                    | Result                        |                                                       |                                       |                             |                                                                     |         |
| 1                                      |                                                              | 1                                                   | 1       |                      |                                           |                                     |                        |                          |                              |                           |                               |                                                       |                                       |                             |                                                                     |         |
| 2                                      |                                                              | 2                                                   | 2       |                      |                                           |                                     |                        |                          |                              |                           |                               |                                                       |                                       |                             |                                                                     |         |
| 1                                      |                                                              | 1                                                   | 1       |                      |                                           |                                     |                        |                          |                              |                           |                               |                                                       |                                       |                             |                                                                     |         |
| 2                                      |                                                              | 2                                                   | 2       |                      |                                           |                                     |                        |                          |                              |                           |                               |                                                       |                                       |                             |                                                                     |         |
| 1                                      |                                                              | 1                                                   | 1       |                      |                                           |                                     |                        |                          |                              |                           |                               |                                                       |                                       |                             |                                                                     |         |
| 2                                      |                                                              | 2                                                   | 2       |                      |                                           |                                     |                        |                          |                              |                           |                               |                                                       |                                       |                             |                                                                     |         |
| 1                                      |                                                              | 1                                                   | 1       |                      |                                           |                                     |                        |                          |                              |                           |                               |                                                       |                                       |                             |                                                                     |         |
| 2                                      |                                                              | 2                                                   | 2       |                      |                                           |                                     |                        |                          |                              |                           |                               |                                                       |                                       |                             |                                                                     |         |
| 1                                      |                                                              | 1                                                   | 1       |                      |                                           |                                     |                        |                          |                              |                           |                               |                                                       |                                       |                             |                                                                     |         |
| 2                                      |                                                              | 2                                                   | 2       |                      |                                           |                                     |                        |                          |                              |                           |                               |                                                       |                                       |                             |                                                                     |         |
| 1                                      |                                                              | 1                                                   | 1       |                      |                                           |                                     |                        |                          |                              |                           |                               |                                                       |                                       |                             |                                                                     |         |
| 2                                      |                                                              | 2                                                   | 2       |                      |                                           |                                     |                        |                          |                              |                           |                               |                                                       |                                       |                             |                                                                     |         |
| 1                                      |                                                              | 1                                                   | 1       |                      |                                           |                                     |                        |                          |                              |                           |                               |                                                       |                                       |                             |                                                                     |         |
| 2                                      |                                                              | 2                                                   | 2       |                      |                                           |                                     |                        |                          |                              |                           |                               |                                                       |                                       |                             |                                                                     |         |
| 1                                      |                                                              | 1                                                   | 1       |                      |                                           |                                     |                        |                          |                              |                           |                               |                                                       |                                       |                             |                                                                     |         |
| 2                                      |                                                              | 2                                                   | 2       |                      |                                           |                                     |                        |                          |                              |                           |                               |                                                       |                                       |                             |                                                                     |         |
| 1                                      |                                                              | 1                                                   | 1       |                      |                                           |                                     |                        |                          |                              |                           |                               |                                                       |                                       |                             |                                                                     |         |
| 2                                      |                                                              | 2                                                   | 2       |                      |                                           |                                     |                        |                          |                              |                           |                               |                                                       |                                       |                             |                                                                     |         |
| Total Xpert Positive:                  |                                                              |                                                     |         | Total Rif Resistance |                                           | Total tested Positive:              | Total MDR-TB:          | Total number suggestive: | Total number testedpositive: | Total number reactive:    | Total:                        | Total started Rx:                                     | Total died:                           | Total not on Rx:            | Total started TPT:                                                  |         |

6. Tick whether sputum results were back within 48hrs.

7. Write date on which the patient was initiated on Treatment.

8. Write a date for TPT start.

Compiled by: ..... Signature: ..... Date: ..... Verified by: ..... Signature: ..... Date: .....

## TUBERCULOSIS IDENTIFICATION REGISTER

District: .....

| Specimen Barcode Number <sup>1</sup> | Patient Folder Number | Surname<br>(Top row)<br><br>First name(s)<br>(Bottom row) | Date of birth<br>(Top row)<br>DD / MM / YYYY | Gender<br>M / F | Physical Home Address <sup>2</sup> /<br>Land Mark | Telephone /<br>Cellphone | TB symptoms<br>Identified<br><br>Yes / No<br><br>If Yes (Code) <sup>3</sup> | Risk Groups                      |                                 |                              |                                    |                               | TB Investigations                                         |                                                             |   |
|--------------------------------------|-----------------------|-----------------------------------------------------------|----------------------------------------------|-----------------|---------------------------------------------------|--------------------------|-----------------------------------------------------------------------------|----------------------------------|---------------------------------|------------------------------|------------------------------------|-------------------------------|-----------------------------------------------------------|-------------------------------------------------------------|---|
|                                      |                       |                                                           | Age<br>(Bottom row)                          |                 |                                                   |                          |                                                                             | Contact (Y / N)<br>(Top row)     | HIV Status<br>(Pos / Neg / Unk) | Pregnant<br>(Y / N)          | Diabetes Mellitus<br>(Y / N / Unk) | COVID-19<br>(Pos / Neg / Unk) | Bacteriological investigation                             |                                                             |   |
|                                      |                       |                                                           |                                              |                 |                                                   |                          |                                                                             | DS/ DR- TB / unk<br>(Bottom row) |                                 |                              |                                    |                               | Date Specimen<br>collected <sup>4</sup><br>DD / MM / YYYY | Date test Result<br>received <sup>5</sup><br>DD / MM / YYYY |   |
|                                      |                       |                                                           |                                              |                 |                                                   |                          |                                                                             |                                  |                                 |                              |                                    |                               |                                                           | 1                                                           | 1 |
|                                      |                       |                                                           |                                              |                 |                                                   |                          |                                                                             |                                  |                                 |                              |                                    |                               |                                                           | 2                                                           | 2 |
|                                      |                       |                                                           |                                              |                 |                                                   |                          |                                                                             |                                  |                                 |                              |                                    |                               |                                                           | 1                                                           | 1 |
|                                      |                       |                                                           |                                              |                 |                                                   |                          |                                                                             |                                  |                                 |                              |                                    |                               |                                                           | 2                                                           | 2 |
|                                      |                       |                                                           |                                              |                 |                                                   |                          |                                                                             |                                  |                                 |                              |                                    |                               |                                                           | 1                                                           | 1 |
|                                      |                       |                                                           |                                              |                 |                                                   |                          |                                                                             |                                  |                                 |                              |                                    |                               |                                                           | 2                                                           | 2 |
|                                      |                       |                                                           |                                              |                 |                                                   |                          |                                                                             |                                  |                                 |                              |                                    |                               |                                                           | 1                                                           | 1 |
|                                      |                       |                                                           |                                              |                 |                                                   |                          |                                                                             |                                  |                                 |                              |                                    |                               |                                                           | 2                                                           | 2 |
|                                      |                       |                                                           |                                              |                 |                                                   |                          |                                                                             |                                  |                                 |                              |                                    |                               |                                                           | 1                                                           | 1 |
|                                      |                       |                                                           |                                              |                 |                                                   |                          |                                                                             |                                  |                                 |                              |                                    |                               |                                                           | 2                                                           | 2 |
|                                      |                       |                                                           |                                              |                 |                                                   |                          |                                                                             |                                  |                                 |                              |                                    |                               |                                                           | 1                                                           | 1 |
|                                      |                       |                                                           |                                              |                 |                                                   |                          |                                                                             |                                  |                                 |                              |                                    |                               |                                                           | 2                                                           | 2 |
|                                      |                       |                                                           |                                              |                 |                                                   |                          |                                                                             |                                  |                                 |                              |                                    |                               |                                                           | 1                                                           | 1 |
|                                      |                       |                                                           |                                              |                 |                                                   |                          |                                                                             |                                  |                                 |                              |                                    |                               |                                                           | 2                                                           | 2 |
| TOTALS:                              |                       |                                                           |                                              |                 |                                                   |                          |                                                                             |                                  | Total<br>number<br>positive:    | Total<br>number<br>pregnant: | Total<br>number<br>Diabetic:       | Total<br>number<br>positive:  |                                                           |                                                             |   |

1. Place Barcode sticker from the laboratory form / write Barcode number eg. AAGX8459

2. Full detailed address of where the patient lives or can be reached during the day.

3. Use the coding on the instruction cover for TB symptoms (i.e. 1= Cough)

4. Write down a date the patient produced specimen

5. Write date when the test results were received by facility

Sub District: ..... Facility Name: .....

| TB Investigations                      |                                                              |                                                     |         |                      |                                           |                                     |                         |                          |                              |                           |                               | TB Confirmed Clients (DS-TB and DR-TB)                |                                       |                             | TPT Start Date <sup>8</sup><br>(for contacts, PLHIV) DD / MM / YYYY | REMARKS |
|----------------------------------------|--------------------------------------------------------------|-----------------------------------------------------|---------|----------------------|-------------------------------------------|-------------------------------------|-------------------------|--------------------------|------------------------------|---------------------------|-------------------------------|-------------------------------------------------------|---------------------------------------|-----------------------------|---------------------------------------------------------------------|---------|
| Bacteriological investigation          |                                                              |                                                     |         |                      |                                           | Non- Bacteriological Investigations |                         |                          |                              |                           |                               | Date Treatment Started <sup>7</sup><br>DD / MM / YYYY | Died before Treatment Start<br>(Tick) | Loss to follow up<br>(Tick) |                                                                     |         |
| Xpert<br>(1 <sup>st</sup> Test)        | Smear Microscopy<br>(Pos, Neg, Scanty, not done / no result) | TEST RESULT TURN AROUND TIME <sup>6</sup><br>(Tick) |         | Rif Susceptibility   | TB CULTURE / LPA / DST                    |                                     |                         | X-Ray<br>DD / MM / YYYY  | U-LAM<br>DD / MM / YYYY      | Mantoux<br>DD / MM / YYYY | Other Tests<br>DD / MM / YYYY |                                                       |                                       |                             |                                                                     |         |
| Xpert<br>(2 <sup>nd</sup> test if any) | Grading<br>(bottom row)                                      | < 48hrs                                             | > 48hrs | R / S                | Date specimen collected<br>DD / MM / YYYY | Result<br>(Pos / Neg)               | Resistance<br>( R / H ) | Result                   | Result                       | Result                    | Result                        |                                                       |                                       |                             |                                                                     |         |
| 1                                      |                                                              | 1                                                   | 1       |                      |                                           |                                     |                         |                          |                              |                           |                               |                                                       |                                       |                             |                                                                     |         |
| 2                                      |                                                              | 2                                                   | 2       |                      |                                           |                                     |                         |                          |                              |                           |                               |                                                       |                                       |                             |                                                                     |         |
| 1                                      |                                                              | 1                                                   | 1       |                      |                                           |                                     |                         |                          |                              |                           |                               |                                                       |                                       |                             |                                                                     |         |
| 2                                      |                                                              | 2                                                   | 2       |                      |                                           |                                     |                         |                          |                              |                           |                               |                                                       |                                       |                             |                                                                     |         |
| 1                                      |                                                              | 1                                                   | 1       |                      |                                           |                                     |                         |                          |                              |                           |                               |                                                       |                                       |                             |                                                                     |         |
| 2                                      |                                                              | 2                                                   | 2       |                      |                                           |                                     |                         |                          |                              |                           |                               |                                                       |                                       |                             |                                                                     |         |
| 1                                      |                                                              | 1                                                   | 1       |                      |                                           |                                     |                         |                          |                              |                           |                               |                                                       |                                       |                             |                                                                     |         |
| 2                                      |                                                              | 2                                                   | 2       |                      |                                           |                                     |                         |                          |                              |                           |                               |                                                       |                                       |                             |                                                                     |         |
| 1                                      |                                                              | 1                                                   | 1       |                      |                                           |                                     |                         |                          |                              |                           |                               |                                                       |                                       |                             |                                                                     |         |
| 2                                      |                                                              | 2                                                   | 2       |                      |                                           |                                     |                         |                          |                              |                           |                               |                                                       |                                       |                             |                                                                     |         |
| 1                                      |                                                              | 1                                                   | 1       |                      |                                           |                                     |                         |                          |                              |                           |                               |                                                       |                                       |                             |                                                                     |         |
| 2                                      |                                                              | 2                                                   | 2       |                      |                                           |                                     |                         |                          |                              |                           |                               |                                                       |                                       |                             |                                                                     |         |
| 1                                      |                                                              | 1                                                   | 1       |                      |                                           |                                     |                         |                          |                              |                           |                               |                                                       |                                       |                             |                                                                     |         |
| 2                                      |                                                              | 2                                                   | 2       |                      |                                           |                                     |                         |                          |                              |                           |                               |                                                       |                                       |                             |                                                                     |         |
| 1                                      |                                                              | 1                                                   | 1       |                      |                                           |                                     |                         |                          |                              |                           |                               |                                                       |                                       |                             |                                                                     |         |
| 2                                      |                                                              | 2                                                   | 2       |                      |                                           |                                     |                         |                          |                              |                           |                               |                                                       |                                       |                             |                                                                     |         |
| 1                                      |                                                              | 1                                                   | 1       |                      |                                           |                                     |                         |                          |                              |                           |                               |                                                       |                                       |                             |                                                                     |         |
| 2                                      |                                                              | 2                                                   | 2       |                      |                                           |                                     |                         |                          |                              |                           |                               |                                                       |                                       |                             |                                                                     |         |
| Total Xpert Positive:                  |                                                              |                                                     |         | Total Rif Resistance |                                           | Total tested Positive:              | Total MDR-TB:           | Total number suggestive: | Total number testedpositive: | Total number reactive:    | Total:                        | Total started Rx:                                     | Total died:                           | Total not on Rx:            | Total started TPT:                                                  |         |

6. Tick whether sputum results were back within 48hrs.

7. Write date on which the patient was initiated on Treatment.

8. Write a date for TPT start.

Compiled by: ..... Signature: ..... Date: ..... Verified by: ..... Signature: ..... Date: .....

## TUBERCULOSIS IDENTIFICATION REGISTER

District: .....

| Specimen Barcode Number <sup>1</sup> | Patient Folder Number | Surname<br>(Top row)<br><br>First name(s)<br>(Bottom row) | Date of birth<br>(Top row)<br>DD / MM / YYYY | Gender<br>M / F | Physical Home Address <sup>2</sup> /<br>Land Mark | Telephone /<br>Cellphone | TB symptoms<br>Identified | Risk Groups                |                                  |                                 |                        |                                    | TB Investigations             |                                                           |                                                             |
|--------------------------------------|-----------------------|-----------------------------------------------------------|----------------------------------------------|-----------------|---------------------------------------------------|--------------------------|---------------------------|----------------------------|----------------------------------|---------------------------------|------------------------|------------------------------------|-------------------------------|-----------------------------------------------------------|-------------------------------------------------------------|
|                                      |                       |                                                           | Age<br>(Bottom row)                          |                 |                                                   |                          |                           | Yes / No                   | Contact (Y / N)<br>(Top row)     | HIV Status<br>(Pos / Neg / Unk) | Pregnant<br>(Y / N)    | Diabetes Mellitus<br>(Y / N / Unk) | COVID-19<br>(Pos / Neg / Unk) | Bacteriological investigation                             |                                                             |
|                                      |                       |                                                           |                                              |                 |                                                   |                          |                           | If Yes (Code) <sup>3</sup> | DS/ DR- TB / unk<br>(Bottom row) |                                 |                        |                                    |                               | Date Specimen<br>collected <sup>4</sup><br>DD / MM / YYYY | Date test Result<br>received <sup>5</sup><br>DD / MM / YYYY |
|                                      |                       |                                                           |                                              |                 |                                                   |                          |                           |                            |                                  |                                 |                        |                                    |                               | 1                                                         | 1                                                           |
|                                      |                       |                                                           |                                              |                 |                                                   |                          |                           |                            |                                  |                                 |                        |                                    |                               | 2                                                         | 2                                                           |
|                                      |                       |                                                           |                                              |                 |                                                   |                          |                           |                            |                                  |                                 |                        |                                    |                               | 1                                                         | 1                                                           |
|                                      |                       |                                                           |                                              |                 |                                                   |                          |                           |                            |                                  |                                 |                        |                                    |                               | 2                                                         | 2                                                           |
|                                      |                       |                                                           |                                              |                 |                                                   |                          |                           |                            |                                  |                                 |                        |                                    |                               | 1                                                         | 1                                                           |
|                                      |                       |                                                           |                                              |                 |                                                   |                          |                           |                            |                                  |                                 |                        |                                    |                               | 2                                                         | 2                                                           |
|                                      |                       |                                                           |                                              |                 |                                                   |                          |                           |                            |                                  |                                 |                        |                                    |                               | 1                                                         | 1                                                           |
|                                      |                       |                                                           |                                              |                 |                                                   |                          |                           |                            |                                  |                                 |                        |                                    |                               | 2                                                         | 2                                                           |
|                                      |                       |                                                           |                                              |                 |                                                   |                          |                           |                            |                                  |                                 |                        |                                    |                               | 1                                                         | 1                                                           |
|                                      |                       |                                                           |                                              |                 |                                                   |                          |                           |                            |                                  |                                 |                        |                                    |                               | 2                                                         | 2                                                           |
|                                      |                       |                                                           |                                              |                 |                                                   |                          |                           |                            |                                  |                                 |                        |                                    |                               | 1                                                         | 1                                                           |
|                                      |                       |                                                           |                                              |                 |                                                   |                          |                           |                            |                                  |                                 |                        |                                    |                               | 2                                                         | 2                                                           |
|                                      |                       |                                                           |                                              |                 |                                                   |                          |                           |                            |                                  |                                 |                        |                                    |                               | 1                                                         | 1                                                           |
|                                      |                       |                                                           |                                              |                 |                                                   |                          |                           |                            |                                  |                                 |                        |                                    |                               | 2                                                         | 2                                                           |
| TOTALS:                              |                       |                                                           |                                              |                 |                                                   |                          |                           |                            | Total number positive:           | Total number pregnant:          | Total number Diabetic: | Total number positive:             |                               |                                                           |                                                             |

1. Place Barcode sticker from the laboratory form / write Barcode number eg. AAGX8459

2. Full detailed address of where the patient lives or can be reached during the day.

3. Use the coding on the instruction cover for TB symptoms (i.e. 1= Cough)

4. Write down a date the patient produced specimen

5. Write date when the test results were received by facility



Sub District: ..... Facility Name: .....

| TB Investigations                      |                                                              |                                                     |         |                      |                                           |                                     |                         |                          |                              |                           |                               | TB Confirmed Clients (DS-TB and DR-TB)                |                                       |                             | TPT Start Date <sup>8</sup><br>(for contacts, PLHIV) DD / MM / YYYY | REMARKS |
|----------------------------------------|--------------------------------------------------------------|-----------------------------------------------------|---------|----------------------|-------------------------------------------|-------------------------------------|-------------------------|--------------------------|------------------------------|---------------------------|-------------------------------|-------------------------------------------------------|---------------------------------------|-----------------------------|---------------------------------------------------------------------|---------|
| Bacteriological investigation          |                                                              |                                                     |         |                      |                                           | Non- Bacteriological Investigations |                         |                          |                              |                           |                               | Date Treatment Started <sup>7</sup><br>DD / MM / YYYY | Died before Treatment Start<br>(Tick) | Loss to follow up<br>(Tick) |                                                                     |         |
| Xpert<br>(1 <sup>st</sup> Test)        | Smear Microscopy<br>(Pos, Neg, Scanty, not done / no result) | TEST RESULT TURN AROUND TIME <sup>6</sup><br>(Tick) |         | Rif Susceptibility   | TB CULTURE / LPA / DST                    |                                     |                         | X-Ray<br>DD / MM / YYYY  | U-LAM<br>DD / MM / YYYY      | Mantoux<br>DD / MM / YYYY | Other Tests<br>DD / MM / YYYY |                                                       |                                       |                             |                                                                     |         |
| Xpert<br>(2 <sup>nd</sup> test if any) | Grading<br>(bottom row)                                      | < 48hrs                                             | > 48hrs | R / S                | Date specimen collected<br>DD / MM / YYYY | Result<br>(Pos / Neg)               | Resistance<br>( R / H ) | Result                   | Result                       | Result                    | Result                        |                                                       |                                       |                             |                                                                     |         |
| 1                                      |                                                              | 1                                                   | 1       |                      |                                           |                                     |                         |                          |                              |                           |                               |                                                       |                                       |                             |                                                                     |         |
| 2                                      |                                                              | 2                                                   | 2       |                      |                                           |                                     |                         |                          |                              |                           |                               |                                                       |                                       |                             |                                                                     |         |
| 1                                      |                                                              | 1                                                   | 1       |                      |                                           |                                     |                         |                          |                              |                           |                               |                                                       |                                       |                             |                                                                     |         |
| 2                                      |                                                              | 2                                                   | 2       |                      |                                           |                                     |                         |                          |                              |                           |                               |                                                       |                                       |                             |                                                                     |         |
| 1                                      |                                                              | 1                                                   | 1       |                      |                                           |                                     |                         |                          |                              |                           |                               |                                                       |                                       |                             |                                                                     |         |
| 2                                      |                                                              | 2                                                   | 2       |                      |                                           |                                     |                         |                          |                              |                           |                               |                                                       |                                       |                             |                                                                     |         |
| 1                                      |                                                              | 1                                                   | 1       |                      |                                           |                                     |                         |                          |                              |                           |                               |                                                       |                                       |                             |                                                                     |         |
| 2                                      |                                                              | 2                                                   | 2       |                      |                                           |                                     |                         |                          |                              |                           |                               |                                                       |                                       |                             |                                                                     |         |
| 1                                      |                                                              | 1                                                   | 1       |                      |                                           |                                     |                         |                          |                              |                           |                               |                                                       |                                       |                             |                                                                     |         |
| 2                                      |                                                              | 2                                                   | 2       |                      |                                           |                                     |                         |                          |                              |                           |                               |                                                       |                                       |                             |                                                                     |         |
| 1                                      |                                                              | 1                                                   | 1       |                      |                                           |                                     |                         |                          |                              |                           |                               |                                                       |                                       |                             |                                                                     |         |
| 2                                      |                                                              | 2                                                   | 2       |                      |                                           |                                     |                         |                          |                              |                           |                               |                                                       |                                       |                             |                                                                     |         |
| 1                                      |                                                              | 1                                                   | 1       |                      |                                           |                                     |                         |                          |                              |                           |                               |                                                       |                                       |                             |                                                                     |         |
| 2                                      |                                                              | 2                                                   | 2       |                      |                                           |                                     |                         |                          |                              |                           |                               |                                                       |                                       |                             |                                                                     |         |
| 1                                      |                                                              | 1                                                   | 1       |                      |                                           |                                     |                         |                          |                              |                           |                               |                                                       |                                       |                             |                                                                     |         |
| 2                                      |                                                              | 2                                                   | 2       |                      |                                           |                                     |                         |                          |                              |                           |                               |                                                       |                                       |                             |                                                                     |         |
| 1                                      |                                                              | 1                                                   | 1       |                      |                                           |                                     |                         |                          |                              |                           |                               |                                                       |                                       |                             |                                                                     |         |
| 2                                      |                                                              | 2                                                   | 2       |                      |                                           |                                     |                         |                          |                              |                           |                               |                                                       |                                       |                             |                                                                     |         |
| Total Xpert Positive:                  |                                                              |                                                     |         | Total Rif Resistance |                                           | Total tested Positive:              | Total MDR-TB:           | Total number suggestive: | Total number testedpositive: | Total number reactive:    | Total:                        | Total started Rx:                                     | Total died:                           | Total not on Rx:            | Total started TPT:                                                  |         |

6. Tick whether sputum results were back within 48hrs.

7. Write date on which the patient was initiated on Treatment.

8. Write a date for TPT start.

Compiled by: ..... Signature: ..... Date: ..... Verified by: ..... Signature: ..... Date: .....

## TUBERCULOSIS IDENTIFICATION REGISTER

District: .....

| Specimen Barcode Number <sup>1</sup> | Patient Folder Number | Surname<br>(Top row)<br><br>First name(s)<br>(Bottom row) | Date of birth<br>(Top row)<br>DD / MM / YYYY | Gender<br>M / F | Physical Home Address <sup>2</sup> /<br>Land Mark | Telephone /<br>Cellphone | TB symptoms<br>Identified | Risk Groups                |                                  |                                 |                              |                                    | TB Investigations             |                                                           |                                                             |
|--------------------------------------|-----------------------|-----------------------------------------------------------|----------------------------------------------|-----------------|---------------------------------------------------|--------------------------|---------------------------|----------------------------|----------------------------------|---------------------------------|------------------------------|------------------------------------|-------------------------------|-----------------------------------------------------------|-------------------------------------------------------------|
|                                      |                       |                                                           | Age<br>(Bottom row)                          |                 |                                                   |                          |                           | Yes / No                   | Contact (Y / N)<br>(Top row)     | HIV Status<br>(Pos / Neg / Unk) | Pregnant<br>(Y / N)          | Diabetes Mellitus<br>(Y / N / Unk) | COVID-19<br>(Pos / Neg / Unk) | Bacteriological investigation                             |                                                             |
|                                      |                       |                                                           |                                              |                 |                                                   |                          |                           | If Yes (Code) <sup>3</sup> | DS/ DR- TB / unk<br>(Bottom row) |                                 |                              |                                    |                               | Date Specimen<br>collected <sup>4</sup><br>DD / MM / YYYY | Date test Result<br>received <sup>5</sup><br>DD / MM / YYYY |
|                                      |                       |                                                           |                                              |                 |                                                   |                          |                           |                            |                                  |                                 |                              |                                    |                               | 1                                                         | 1                                                           |
|                                      |                       |                                                           |                                              |                 |                                                   |                          |                           |                            |                                  |                                 |                              |                                    |                               | 2                                                         | 2                                                           |
|                                      |                       |                                                           |                                              |                 |                                                   |                          |                           |                            |                                  |                                 |                              |                                    |                               | 1                                                         | 1                                                           |
|                                      |                       |                                                           |                                              |                 |                                                   |                          |                           |                            |                                  |                                 |                              |                                    |                               | 2                                                         | 2                                                           |
|                                      |                       |                                                           |                                              |                 |                                                   |                          |                           |                            |                                  |                                 |                              |                                    |                               | 1                                                         | 1                                                           |
|                                      |                       |                                                           |                                              |                 |                                                   |                          |                           |                            |                                  |                                 |                              |                                    |                               | 2                                                         | 2                                                           |
|                                      |                       |                                                           |                                              |                 |                                                   |                          |                           |                            |                                  |                                 |                              |                                    |                               | 1                                                         | 1                                                           |
|                                      |                       |                                                           |                                              |                 |                                                   |                          |                           |                            |                                  |                                 |                              |                                    |                               | 2                                                         | 2                                                           |
|                                      |                       |                                                           |                                              |                 |                                                   |                          |                           |                            |                                  |                                 |                              |                                    |                               | 1                                                         | 1                                                           |
|                                      |                       |                                                           |                                              |                 |                                                   |                          |                           |                            |                                  |                                 |                              |                                    |                               | 2                                                         | 2                                                           |
|                                      |                       |                                                           |                                              |                 |                                                   |                          |                           |                            |                                  |                                 |                              |                                    |                               | 1                                                         | 1                                                           |
|                                      |                       |                                                           |                                              |                 |                                                   |                          |                           |                            |                                  |                                 |                              |                                    |                               | 2                                                         | 2                                                           |
|                                      |                       |                                                           |                                              |                 |                                                   |                          |                           |                            |                                  |                                 |                              |                                    |                               | 1                                                         | 1                                                           |
|                                      |                       |                                                           |                                              |                 |                                                   |                          |                           |                            |                                  |                                 |                              |                                    |                               | 2                                                         | 2                                                           |
| TOTALS:                              |                       |                                                           |                                              |                 |                                                   |                          |                           |                            | Total<br>number<br>positive:     | Total<br>number<br>pregnant:    | Total<br>number<br>Diabetic: | Total<br>number<br>positive:       |                               |                                                           |                                                             |

1. Place Barcode sticker from the laboratory form / write Barcode number eg. AAGX8459

2. Full detailed address of where the patient lives or can be reached during the day.

3. Use the coding on the instruction cover for TB symptoms (i.e. 1= Cough)

4. Write down a date the patient produced specimen

5. Write date when the test results were received by facility

Sub District: ..... Facility Name: .....

| TB Investigations                      |                                                              |                                                     |         |                      |                                           |                                     |                        |                          |                              |                           |                               | TB Confirmed Clients (DS-TB and DR-TB)                |                                       |                             | REMARKS            |                                                                     |
|----------------------------------------|--------------------------------------------------------------|-----------------------------------------------------|---------|----------------------|-------------------------------------------|-------------------------------------|------------------------|--------------------------|------------------------------|---------------------------|-------------------------------|-------------------------------------------------------|---------------------------------------|-----------------------------|--------------------|---------------------------------------------------------------------|
| Bacteriological investigation          |                                                              |                                                     |         |                      |                                           | Non- Bacteriological Investigations |                        |                          |                              |                           |                               | Date Treatment Started <sup>7</sup><br>DD / MM / YYYY | Died before Treatment Start<br>(Tick) | Loss to follow up<br>(Tick) |                    | TPT Start Date <sup>8</sup><br>(for contacts, PLHIV) DD / MM / YYYY |
| Xpert<br>(1 <sup>st</sup> Test)        | Smear Microscopy<br>(Pos, Neg, Scanty, not done / no result) | TEST RESULT TURN AROUND TIME <sup>6</sup><br>(Tick) |         | Rif Susceptibility   | TB CULTURE / LPA / DST                    |                                     |                        | X-Ray<br>DD / MM / YYYY  | U-LAM<br>DD / MM / YYYY      | Mantoux<br>DD / MM / YYYY | Other Tests<br>DD / MM / YYYY |                                                       |                                       |                             |                    |                                                                     |
| Xpert<br>(2 <sup>nd</sup> test if any) | Grading<br>(bottom row)                                      | < 48hrs                                             | > 48hrs | R / S                | Date specimen collected<br>DD / MM / YYYY | Result<br>(Pos / Neg)               | Resistance<br>( R / H) | Result                   | Result                       | Result                    | Result                        |                                                       |                                       |                             |                    |                                                                     |
| 1                                      |                                                              | 1                                                   | 1       |                      |                                           |                                     |                        |                          |                              |                           |                               |                                                       |                                       |                             |                    |                                                                     |
| 2                                      |                                                              | 2                                                   | 2       |                      |                                           |                                     |                        |                          |                              |                           |                               |                                                       |                                       |                             |                    |                                                                     |
| 1                                      |                                                              | 1                                                   | 1       |                      |                                           |                                     |                        |                          |                              |                           |                               |                                                       |                                       |                             |                    |                                                                     |
| 2                                      |                                                              | 2                                                   | 2       |                      |                                           |                                     |                        |                          |                              |                           |                               |                                                       |                                       |                             |                    |                                                                     |
| 1                                      |                                                              | 1                                                   | 1       |                      |                                           |                                     |                        |                          |                              |                           |                               |                                                       |                                       |                             |                    |                                                                     |
| 2                                      |                                                              | 2                                                   | 2       |                      |                                           |                                     |                        |                          |                              |                           |                               |                                                       |                                       |                             |                    |                                                                     |
| 1                                      |                                                              | 1                                                   | 1       |                      |                                           |                                     |                        |                          |                              |                           |                               |                                                       |                                       |                             |                    |                                                                     |
| 2                                      |                                                              | 2                                                   | 2       |                      |                                           |                                     |                        |                          |                              |                           |                               |                                                       |                                       |                             |                    |                                                                     |
| 1                                      |                                                              | 1                                                   | 1       |                      |                                           |                                     |                        |                          |                              |                           |                               |                                                       |                                       |                             |                    |                                                                     |
| 2                                      |                                                              | 2                                                   | 2       |                      |                                           |                                     |                        |                          |                              |                           |                               |                                                       |                                       |                             |                    |                                                                     |
| 1                                      |                                                              | 1                                                   | 1       |                      |                                           |                                     |                        |                          |                              |                           |                               |                                                       |                                       |                             |                    |                                                                     |
| 2                                      |                                                              | 2                                                   | 2       |                      |                                           |                                     |                        |                          |                              |                           |                               |                                                       |                                       |                             |                    |                                                                     |
| 1                                      |                                                              | 1                                                   | 1       |                      |                                           |                                     |                        |                          |                              |                           |                               |                                                       |                                       |                             |                    |                                                                     |
| 2                                      |                                                              | 2                                                   | 2       |                      |                                           |                                     |                        |                          |                              |                           |                               |                                                       |                                       |                             |                    |                                                                     |
| 1                                      |                                                              | 1                                                   | 1       |                      |                                           |                                     |                        |                          |                              |                           |                               |                                                       |                                       |                             |                    |                                                                     |
| 2                                      |                                                              | 2                                                   | 2       |                      |                                           |                                     |                        |                          |                              |                           |                               |                                                       |                                       |                             |                    |                                                                     |
| 1                                      |                                                              | 1                                                   | 1       |                      |                                           |                                     |                        |                          |                              |                           |                               |                                                       |                                       |                             |                    |                                                                     |
| 2                                      |                                                              | 2                                                   | 2       |                      |                                           |                                     |                        |                          |                              |                           |                               |                                                       |                                       |                             |                    |                                                                     |
| Total Xpert Positive:                  |                                                              |                                                     |         | Total Rif Resistance |                                           | Total tested Positive:              | Total MDR-TB:          | Total number suggestive: | Total number testedpositive: | Total number reactive:    | Total:                        | Total started Rx:                                     | Total died:                           | Total not on Rx:            | Total started TPT: |                                                                     |

6. Tick whether sputum results were back within 48hrs.

7. Write date on which the patient was initiated on Treatment.

8. Write a date for TPT start.

Compiled by: ..... Signature: ..... Date: ..... Verified by: ..... Signature: ..... Date: .....

## TUBERCULOSIS IDENTIFICATION REGISTER

District: .....

| Specimen Barcode Number <sup>1</sup> | Patient Folder Number | Surname<br>(Top row)<br><br>First name(s)<br>(Bottom row) | Date of birth<br>(Top row)<br>DD / MM / YYYY | Gender<br>M / F | Physical Home Address <sup>2</sup> /<br>Land Mark | Telephone /<br>Cellphone | TB symptoms<br>Identified | Risk Groups                |                                  |                                 |                        |                                    | TB Investigations             |                                                           |                                                             |
|--------------------------------------|-----------------------|-----------------------------------------------------------|----------------------------------------------|-----------------|---------------------------------------------------|--------------------------|---------------------------|----------------------------|----------------------------------|---------------------------------|------------------------|------------------------------------|-------------------------------|-----------------------------------------------------------|-------------------------------------------------------------|
|                                      |                       |                                                           | Age<br>(Bottom row)                          |                 |                                                   |                          |                           | Yes / No                   | Contact (Y / N)<br>(Top row)     | HIV Status<br>(Pos / Neg / Unk) | Pregnant<br>(Y / N)    | Diabetes Mellitus<br>(Y / N / Unk) | COVID-19<br>(Pos / Neg / Unk) | Bacteriological investigation                             |                                                             |
|                                      |                       |                                                           |                                              |                 |                                                   |                          |                           | If Yes (Code) <sup>3</sup> | DS/ DR- TB / unk<br>(Bottom row) |                                 |                        |                                    |                               | Date Specimen<br>collected <sup>4</sup><br>DD / MM / YYYY | Date test Result<br>received <sup>5</sup><br>DD / MM / YYYY |
|                                      |                       |                                                           |                                              |                 |                                                   |                          |                           |                            |                                  |                                 |                        |                                    |                               | 1                                                         | 1                                                           |
|                                      |                       |                                                           |                                              |                 |                                                   |                          |                           |                            |                                  |                                 |                        |                                    |                               | 2                                                         | 2                                                           |
|                                      |                       |                                                           |                                              |                 |                                                   |                          |                           |                            |                                  |                                 |                        |                                    |                               | 1                                                         | 1                                                           |
|                                      |                       |                                                           |                                              |                 |                                                   |                          |                           |                            |                                  |                                 |                        |                                    |                               | 2                                                         | 2                                                           |
|                                      |                       |                                                           |                                              |                 |                                                   |                          |                           |                            |                                  |                                 |                        |                                    |                               | 1                                                         | 1                                                           |
|                                      |                       |                                                           |                                              |                 |                                                   |                          |                           |                            |                                  |                                 |                        |                                    |                               | 2                                                         | 2                                                           |
|                                      |                       |                                                           |                                              |                 |                                                   |                          |                           |                            |                                  |                                 |                        |                                    |                               | 1                                                         | 1                                                           |
|                                      |                       |                                                           |                                              |                 |                                                   |                          |                           |                            |                                  |                                 |                        |                                    |                               | 2                                                         | 2                                                           |
|                                      |                       |                                                           |                                              |                 |                                                   |                          |                           |                            |                                  |                                 |                        |                                    |                               | 1                                                         | 1                                                           |
|                                      |                       |                                                           |                                              |                 |                                                   |                          |                           |                            |                                  |                                 |                        |                                    |                               | 2                                                         | 2                                                           |
|                                      |                       |                                                           |                                              |                 |                                                   |                          |                           |                            |                                  |                                 |                        |                                    |                               | 1                                                         | 1                                                           |
|                                      |                       |                                                           |                                              |                 |                                                   |                          |                           |                            |                                  |                                 |                        |                                    |                               | 2                                                         | 2                                                           |
|                                      |                       |                                                           |                                              |                 |                                                   |                          |                           |                            |                                  |                                 |                        |                                    |                               | 1                                                         | 1                                                           |
|                                      |                       |                                                           |                                              |                 |                                                   |                          |                           |                            |                                  |                                 |                        |                                    |                               | 2                                                         | 2                                                           |
| TOTALS:                              |                       |                                                           |                                              |                 |                                                   |                          |                           |                            | Total number positive:           | Total number pregnant:          | Total number Diabetic: | Total number positive:             |                               |                                                           |                                                             |

1. Place Barcode sticker from the laboratory form / write Barcode number eg. AAGX8459

2. Full detailed address of where the patient lives or can be reached during the day.

3. Use the coding on the instruction cover for TB symptoms (i.e. 1= Cough)

4. Write down a date the patient produced specimen

5. Write date when the test results were received by facility

Sub District: ..... Facility Name: .....

| TB Investigations                      |                                                              |                                                     |         |                      |                                           |                                     |                        |                          |                              |                           |                               | TB Confirmed Clients (DS-TB and DR-TB)                |                                       |                             | REMARKS            |                                                                    |
|----------------------------------------|--------------------------------------------------------------|-----------------------------------------------------|---------|----------------------|-------------------------------------------|-------------------------------------|------------------------|--------------------------|------------------------------|---------------------------|-------------------------------|-------------------------------------------------------|---------------------------------------|-----------------------------|--------------------|--------------------------------------------------------------------|
| Bacteriological investigation          |                                                              |                                                     |         |                      |                                           | Non- Bacteriological Investigations |                        |                          |                              |                           |                               | Date Treatment Started <sup>7</sup><br>DD / MM / YYYY | Died before Treatment Start<br>(Tick) | Loss to follow up<br>(Tick) |                    | TPT Start Date <sup>8</sup><br>(for contacts, PLHV) DD / MM / YYYY |
| Xpert<br>(1 <sup>st</sup> Test)        | Smear Microscopy<br>(Pos, Neg, Scanty, not done / no result) | TEST RESULT TURN AROUND TIME <sup>6</sup><br>(Tick) |         | Rif Susceptibility   | TB CULTURE / LPA / DST                    |                                     |                        | X-Ray<br>DD / MM / YYYY  | U-LAM<br>DD / MM / YYYY      | Mantoux<br>DD / MM / YYYY | Other Tests<br>DD / MM / YYYY |                                                       |                                       |                             |                    |                                                                    |
| Xpert<br>(2 <sup>nd</sup> test if any) | Grading<br>(bottom row)                                      | < 48hrs                                             | > 48hrs | R / S                | Date specimen collected<br>DD / MM / YYYY | Result<br>(Pos / Neg)               | Resistance<br>( R / H) | Result                   | Result                       | Result                    | Result                        |                                                       |                                       |                             |                    |                                                                    |
| 1                                      |                                                              | 1                                                   | 1       |                      |                                           |                                     |                        |                          |                              |                           |                               |                                                       |                                       |                             |                    |                                                                    |
| 2                                      |                                                              | 2                                                   | 2       |                      |                                           |                                     |                        |                          |                              |                           |                               |                                                       |                                       |                             |                    |                                                                    |
| 1                                      |                                                              | 1                                                   | 1       |                      |                                           |                                     |                        |                          |                              |                           |                               |                                                       |                                       |                             |                    |                                                                    |
| 2                                      |                                                              | 2                                                   | 2       |                      |                                           |                                     |                        |                          |                              |                           |                               |                                                       |                                       |                             |                    |                                                                    |
| 1                                      |                                                              | 1                                                   | 1       |                      |                                           |                                     |                        |                          |                              |                           |                               |                                                       |                                       |                             |                    |                                                                    |
| 2                                      |                                                              | 2                                                   | 2       |                      |                                           |                                     |                        |                          |                              |                           |                               |                                                       |                                       |                             |                    |                                                                    |
| 1                                      |                                                              | 1                                                   | 1       |                      |                                           |                                     |                        |                          |                              |                           |                               |                                                       |                                       |                             |                    |                                                                    |
| 2                                      |                                                              | 2                                                   | 2       |                      |                                           |                                     |                        |                          |                              |                           |                               |                                                       |                                       |                             |                    |                                                                    |
| 1                                      |                                                              | 1                                                   | 1       |                      |                                           |                                     |                        |                          |                              |                           |                               |                                                       |                                       |                             |                    |                                                                    |
| 2                                      |                                                              | 2                                                   | 2       |                      |                                           |                                     |                        |                          |                              |                           |                               |                                                       |                                       |                             |                    |                                                                    |
| 1                                      |                                                              | 1                                                   | 1       |                      |                                           |                                     |                        |                          |                              |                           |                               |                                                       |                                       |                             |                    |                                                                    |
| 2                                      |                                                              | 2                                                   | 2       |                      |                                           |                                     |                        |                          |                              |                           |                               |                                                       |                                       |                             |                    |                                                                    |
| 1                                      |                                                              | 1                                                   | 1       |                      |                                           |                                     |                        |                          |                              |                           |                               |                                                       |                                       |                             |                    |                                                                    |
| 2                                      |                                                              | 2                                                   | 2       |                      |                                           |                                     |                        |                          |                              |                           |                               |                                                       |                                       |                             |                    |                                                                    |
| 1                                      |                                                              | 1                                                   | 1       |                      |                                           |                                     |                        |                          |                              |                           |                               |                                                       |                                       |                             |                    |                                                                    |
| 2                                      |                                                              | 2                                                   | 2       |                      |                                           |                                     |                        |                          |                              |                           |                               |                                                       |                                       |                             |                    |                                                                    |
| 1                                      |                                                              | 1                                                   | 1       |                      |                                           |                                     |                        |                          |                              |                           |                               |                                                       |                                       |                             |                    |                                                                    |
| 2                                      |                                                              | 2                                                   | 2       |                      |                                           |                                     |                        |                          |                              |                           |                               |                                                       |                                       |                             |                    |                                                                    |
| Total Xpert Positive:                  |                                                              |                                                     |         | Total Rif Resistance |                                           | Total tested Positive:              | Total MDR-TB:          | Total number suggestive: | Total number testedpositive: | Total number reactive:    | Total:                        | Total started Rx:                                     | Total died:                           | Total not on Rx:            | Total started TPT: |                                                                    |

6. Tick whether sputum results were back within 48hrs.

7. Write date on which the patient was initiated on Treatment.

8. Write a date for TPT start.

Compiled by: ..... Signature: ..... Date: ..... Verified by: ..... Signature: ..... Date: .....

## TUBERCULOSIS IDENTIFICATION REGISTER

District: .....

| Specimen Barcode Number <sup>1</sup> | Patient Folder Number | Surname<br>(Top row)<br><br>First name(s)<br>(Bottom row) | Date of birth<br>(Top row)<br>DD / MM / YYYY | Gender<br>M / F | Physical Home Address <sup>2</sup> /<br>Land Mark | Telephone /<br>Cellphone | TB symptoms<br>Identified | Risk Groups                |                                  |                                 |                        |                                    | TB Investigations             |                                                           |                                                             |
|--------------------------------------|-----------------------|-----------------------------------------------------------|----------------------------------------------|-----------------|---------------------------------------------------|--------------------------|---------------------------|----------------------------|----------------------------------|---------------------------------|------------------------|------------------------------------|-------------------------------|-----------------------------------------------------------|-------------------------------------------------------------|
|                                      |                       |                                                           | Age<br>(Bottom row)                          |                 |                                                   |                          |                           | Yes / No                   | Contact (Y / N)<br>(Top row)     | HIV Status<br>(Pos / Neg / Unk) | Pregnant<br>(Y / N)    | Diabetes Mellitus<br>(Y / N / Unk) | COVID-19<br>(Pos / Neg / Unk) | Bacteriological investigation                             |                                                             |
|                                      |                       |                                                           |                                              |                 |                                                   |                          |                           | If Yes (Code) <sup>3</sup> | DS/ DR- TB / unk<br>(Bottom row) |                                 |                        |                                    |                               | Date Specimen<br>collected <sup>4</sup><br>DD / MM / YYYY | Date test Result<br>received <sup>5</sup><br>DD / MM / YYYY |
|                                      |                       |                                                           |                                              |                 |                                                   |                          |                           |                            |                                  |                                 |                        |                                    |                               | 1                                                         | 1                                                           |
|                                      |                       |                                                           |                                              |                 |                                                   |                          |                           |                            |                                  |                                 |                        |                                    |                               | 2                                                         | 2                                                           |
|                                      |                       |                                                           |                                              |                 |                                                   |                          |                           |                            |                                  |                                 |                        |                                    |                               | 1                                                         | 1                                                           |
|                                      |                       |                                                           |                                              |                 |                                                   |                          |                           |                            |                                  |                                 |                        |                                    |                               | 2                                                         | 2                                                           |
|                                      |                       |                                                           |                                              |                 |                                                   |                          |                           |                            |                                  |                                 |                        |                                    |                               | 1                                                         | 1                                                           |
|                                      |                       |                                                           |                                              |                 |                                                   |                          |                           |                            |                                  |                                 |                        |                                    |                               | 2                                                         | 2                                                           |
|                                      |                       |                                                           |                                              |                 |                                                   |                          |                           |                            |                                  |                                 |                        |                                    |                               | 1                                                         | 1                                                           |
|                                      |                       |                                                           |                                              |                 |                                                   |                          |                           |                            |                                  |                                 |                        |                                    |                               | 2                                                         | 2                                                           |
|                                      |                       |                                                           |                                              |                 |                                                   |                          |                           |                            |                                  |                                 |                        |                                    |                               | 1                                                         | 1                                                           |
|                                      |                       |                                                           |                                              |                 |                                                   |                          |                           |                            |                                  |                                 |                        |                                    |                               | 2                                                         | 2                                                           |
|                                      |                       |                                                           |                                              |                 |                                                   |                          |                           |                            |                                  |                                 |                        |                                    |                               | 1                                                         | 1                                                           |
|                                      |                       |                                                           |                                              |                 |                                                   |                          |                           |                            |                                  |                                 |                        |                                    |                               | 2                                                         | 2                                                           |
|                                      |                       |                                                           |                                              |                 |                                                   |                          |                           |                            |                                  |                                 |                        |                                    |                               | 1                                                         | 1                                                           |
|                                      |                       |                                                           |                                              |                 |                                                   |                          |                           |                            |                                  |                                 |                        |                                    |                               | 2                                                         | 2                                                           |
| TOTALS:                              |                       |                                                           |                                              |                 |                                                   |                          |                           |                            | Total number positive:           | Total number pregnant:          | Total number Diabetic: | Total number positive:             |                               |                                                           |                                                             |

1. Place Barcode sticker from the laboratory form / write Barcode number eg. AAGX8459

2. Full detailed address of where the patient lives or can be reached during the day.

3. Use the coding on the instruction cover for TB symptoms (i.e. 1= Cough)

4. Write down a date the patient produced specimen

5. Write date when the test results were received by facility

Sub District: ..... Facility Name: .....

| TB Investigations                      |                                                              |                                                     |         |                      |                                           |                                     |                        |                          |                              |                           |                               | TB Confirmed Clients (DS-TB and DR-TB)                |                                       |                             | REMARKS            |                                                                     |
|----------------------------------------|--------------------------------------------------------------|-----------------------------------------------------|---------|----------------------|-------------------------------------------|-------------------------------------|------------------------|--------------------------|------------------------------|---------------------------|-------------------------------|-------------------------------------------------------|---------------------------------------|-----------------------------|--------------------|---------------------------------------------------------------------|
| Bacteriological investigation          |                                                              |                                                     |         |                      |                                           | Non- Bacteriological Investigations |                        |                          |                              |                           |                               | Date Treatment Started <sup>7</sup><br>DD / MM / YYYY | Died before Treatment Start<br>(Tick) | Loss to follow up<br>(Tick) |                    | TPT Start Date <sup>8</sup><br>(for contacts, PLHIV) DD / MM / YYYY |
| Xpert<br>(1 <sup>st</sup> Test)        | Smear Microscopy<br>(Pos, Neg, Scanty, not done / no result) | TEST RESULT TURN AROUND TIME <sup>6</sup><br>(Tick) |         | Rif Susceptibility   | TB CULTURE / LPA / DST                    |                                     |                        | X-Ray<br>DD / MM / YYYY  | U-LAM<br>DD / MM / YYYY      | Mantoux<br>DD / MM / YYYY | Other Tests<br>DD / MM / YYYY |                                                       |                                       |                             |                    |                                                                     |
| Xpert<br>(2 <sup>nd</sup> test if any) | Grading<br>(bottom row)                                      | < 48hrs                                             | > 48hrs | R / S                | Date specimen collected<br>DD / MM / YYYY | Result<br>(Pos / Neg)               | Resistance<br>( R / H) | Result                   | Result                       | Result                    | Result                        |                                                       |                                       |                             |                    |                                                                     |
| 1                                      |                                                              | 1                                                   | 1       |                      |                                           |                                     |                        |                          |                              |                           |                               |                                                       |                                       |                             |                    |                                                                     |
| 2                                      |                                                              | 2                                                   | 2       |                      |                                           |                                     |                        |                          |                              |                           |                               |                                                       |                                       |                             |                    |                                                                     |
| 1                                      |                                                              | 1                                                   | 1       |                      |                                           |                                     |                        |                          |                              |                           |                               |                                                       |                                       |                             |                    |                                                                     |
| 2                                      |                                                              | 2                                                   | 2       |                      |                                           |                                     |                        |                          |                              |                           |                               |                                                       |                                       |                             |                    |                                                                     |
| 1                                      |                                                              | 1                                                   | 1       |                      |                                           |                                     |                        |                          |                              |                           |                               |                                                       |                                       |                             |                    |                                                                     |
| 2                                      |                                                              | 2                                                   | 2       |                      |                                           |                                     |                        |                          |                              |                           |                               |                                                       |                                       |                             |                    |                                                                     |
| 1                                      |                                                              | 1                                                   | 1       |                      |                                           |                                     |                        |                          |                              |                           |                               |                                                       |                                       |                             |                    |                                                                     |
| 2                                      |                                                              | 2                                                   | 2       |                      |                                           |                                     |                        |                          |                              |                           |                               |                                                       |                                       |                             |                    |                                                                     |
| 1                                      |                                                              | 1                                                   | 1       |                      |                                           |                                     |                        |                          |                              |                           |                               |                                                       |                                       |                             |                    |                                                                     |
| 2                                      |                                                              | 2                                                   | 2       |                      |                                           |                                     |                        |                          |                              |                           |                               |                                                       |                                       |                             |                    |                                                                     |
| 1                                      |                                                              | 1                                                   | 1       |                      |                                           |                                     |                        |                          |                              |                           |                               |                                                       |                                       |                             |                    |                                                                     |
| 2                                      |                                                              | 2                                                   | 2       |                      |                                           |                                     |                        |                          |                              |                           |                               |                                                       |                                       |                             |                    |                                                                     |
| 1                                      |                                                              | 1                                                   | 1       |                      |                                           |                                     |                        |                          |                              |                           |                               |                                                       |                                       |                             |                    |                                                                     |
| 2                                      |                                                              | 2                                                   | 2       |                      |                                           |                                     |                        |                          |                              |                           |                               |                                                       |                                       |                             |                    |                                                                     |
| 1                                      |                                                              | 1                                                   | 1       |                      |                                           |                                     |                        |                          |                              |                           |                               |                                                       |                                       |                             |                    |                                                                     |
| 2                                      |                                                              | 2                                                   | 2       |                      |                                           |                                     |                        |                          |                              |                           |                               |                                                       |                                       |                             |                    |                                                                     |
| 1                                      |                                                              | 1                                                   | 1       |                      |                                           |                                     |                        |                          |                              |                           |                               |                                                       |                                       |                             |                    |                                                                     |
| 2                                      |                                                              | 2                                                   | 2       |                      |                                           |                                     |                        |                          |                              |                           |                               |                                                       |                                       |                             |                    |                                                                     |
| Total Xpert Positive:                  |                                                              |                                                     |         | Total Rif Resistance |                                           | Total tested Positive:              | Total MDR-TB:          | Total number suggestive: | Total number testedpositive: | Total number reactive:    | Total:                        | Total started Rx:                                     | Total died:                           | Total not on Rx:            | Total started TPT: |                                                                     |

6. Tick whether sputum results were back within 48hrs.

7. Write date on which the patient was initiated on Treatment.

8. Write a date for TPT start.

Compiled by: ..... Signature: ..... Date: ..... Verified by: ..... Signature: ..... Date: .....

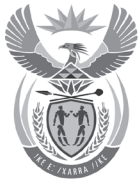

health

Department:  
Health  
REPUBLIC OF SOUTH AFRICA

**SUMMARY FOR TB DETECTION**

| Year: ..... |              | Number of clients with TB symptoms |         |         | Risk groups with identified TB symptoms |          |          |          |          | Risk groups Investigated for TB |          |          |          |          | Number of clients investigated for TB |         |                           |         |
|-------------|--------------|------------------------------------|---------|---------|-----------------------------------------|----------|----------|----------|----------|---------------------------------|----------|----------|----------|----------|---------------------------------------|---------|---------------------------|---------|
|             |              | Total                              | > 5 yrs | ≤ 5 yrs | HIV Pos                                 | Diabetic | Pregnant | Contacts | COVID 19 | HIV Pos                         | Diabetic | Pregnant | Contacts | COVID 19 | Bacteriological tests                 |         | Non Bacteriological tests |         |
|             |              |                                    |         |         |                                         |          |          |          |          |                                 |          |          |          |          | < 5 yrs                               | ≥ 5 yrs | < 5 yrs                   | ≥ 5 yrs |
| Quarter 1   | January      |                                    |         |         |                                         |          |          |          |          |                                 |          |          |          |          |                                       |         |                           |         |
|             | February     |                                    |         |         |                                         |          |          |          |          |                                 |          |          |          |          |                                       |         |                           |         |
|             | March        |                                    |         |         |                                         |          |          |          |          |                                 |          |          |          |          |                                       |         |                           |         |
|             | <b>Total</b> |                                    |         |         |                                         |          |          |          |          |                                 |          |          |          |          |                                       |         |                           |         |
| Quarter 2   | April        |                                    |         |         |                                         |          |          |          |          |                                 |          |          |          |          |                                       |         |                           |         |
|             | May          |                                    |         |         |                                         |          |          |          |          |                                 |          |          |          |          |                                       |         |                           |         |
|             | June         |                                    |         |         |                                         |          |          |          |          |                                 |          |          |          |          |                                       |         |                           |         |
|             | <b>Total</b> |                                    |         |         |                                         |          |          |          |          |                                 |          |          |          |          |                                       |         |                           |         |
| Quarter 3   | July         |                                    |         |         |                                         |          |          |          |          |                                 |          |          |          |          |                                       |         |                           |         |
|             | August       |                                    |         |         |                                         |          |          |          |          |                                 |          |          |          |          |                                       |         |                           |         |
|             | September    |                                    |         |         |                                         |          |          |          |          |                                 |          |          |          |          |                                       |         |                           |         |
|             | <b>Total</b> |                                    |         |         |                                         |          |          |          |          |                                 |          |          |          |          |                                       |         |                           |         |
| Quarter 4   | October      |                                    |         |         |                                         |          |          |          |          |                                 |          |          |          |          |                                       |         |                           |         |
|             | November     |                                    |         |         |                                         |          |          |          |          |                                 |          |          |          |          |                                       |         |                           |         |
|             | December     |                                    |         |         |                                         |          |          |          |          |                                 |          |          |          |          |                                       |         |                           |         |
|             | <b>Total</b> |                                    |         |         |                                         |          |          |          |          |                                 |          |          |          |          |                                       |         |                           |         |









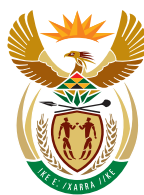

health

---

Department:  
Health  
**REPUBLIC OF SOUTH AFRICA**
