# Supplementary material for: Assessment of facility-based tuberculosis data quality in an integrated HIV/TB database in three South African districts
Source: PubMed Central journal article supplement (PMC10021242; doi:10.1371/journal.pgph.0000312), 2022-09-28
Supplement: pgph.0000312.s002.pdf [file pgph.0000312.s002.pdf]

**HOUSEHOLD CONTACTS**

| Name of contact | Age | Symptom Screened |    | Treatment started |    |     |    |
|-----------------|-----|------------------|----|-------------------|----|-----|----|
|                 |     | Yes              | No | IPT               |    | TB  |    |
|                 |     | Yes              | No | Yes               | No | Yes | No |
|                 |     | Yes              | No | Yes               | No | Yes | No |
|                 |     | Yes              | No | Yes               | No | Yes | No |
|                 |     | Yes              | No | Yes               | No | Yes | No |
|                 |     | Yes              | No | Yes               | No | Yes | No |
|                 |     | Yes              | No | Yes               | No | Yes | No |
|                 |     | Yes              | No | Yes               | No | Yes | No |
|                 |     | Yes              | No | Yes               | No | Yes | No |
|                 |     | Yes              | No | Yes               | No | Yes | No |
|                 |     | Yes              | No | Yes               | No | Yes | No |
|                 |     | Yes              | No | Yes               | No | Yes | No |
|                 |     | Yes              | No | Yes               | No | Yes | No |
|                 |     | Yes              | No | Yes               | No | Yes | No |

**TREATMENT OUTCOMES**

Treatment stop date:

Cured  
 Treatment Completed  
 Lost to follow up  
 Failed treatment  MDR-TB  Rif Resistant TB  
 Died

**REFERRALS**

Moved out  Transferred out Date:

Name of receiving clinic: \_\_\_\_\_

Town/ District: \_\_\_\_\_

Province/ Country: \_\_\_\_\_

Discharged by (Print name): \_\_\_\_\_

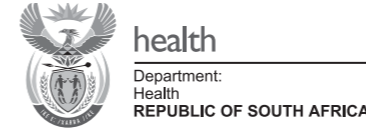

**TB TREATMENT RECORD**

Facility Name: \_\_\_\_\_ District: \_\_\_\_\_

Patient Folder Number: \_\_\_\_\_

N Newly Registered in this facility  
 M Moved in from facility in this district  
 T Transferred in from another district

Facility Name: \_\_\_\_\_  
TB Reg No: \_\_\_\_\_

TB Registration Number:

**PATIENT DETAILS**

ID Number/Date of birth:       \_\_\_\_\_ Age  Gender  M  F

**PHYSICAL ADDRESS**

|                    |                            |
|--------------------|----------------------------|
| Home Address:      | Name of Company/ Employer: |
|                    | Work address:              |
|                    |                            |
| Tel No./Cellphone: | Tel No:                    |
|                    |                            |

**PATIENT CATEGORY**

**CLASSIFICATION OF DISEASE**

New  
 Relapse  
 Re-treatment after Loss to follow up  
 Re-treatment after Failure  
 Other Previously Treated  
 Rifampicin susceptible TB

ICD10 Code

Pulmonary TB

Extra Pulmonary TB

Site of disease \_\_\_\_\_

Isoniazid resistant TB

Name:

**TREATMENT REGIMEN**

Regimen 1  Regimen 3  Other Specify: \_\_\_\_\_

Treatment Start Date

**NEXT OF KIN or FRIEND DETAILS**

Surname \_\_\_\_\_ First Name(s) \_\_\_\_\_ Phone Number \_\_\_\_\_  
 Address: \_\_\_\_\_

**NOTIFICATION INFORMATION (GW17/5)**

Has the GW17/5 form been completed?  Y  N Notification date:

Surname:
